1  
2 **Cryo-EM structure of OSCA1.2 from *Oryza sativa*: Mechanical basis of**  
3 **hyperosmolality-gating in plants**  
4  
5

6 Koustav Maity<sup>1\*</sup>, John Heumann<sup>2\*</sup>, Aaron P. McGrath<sup>1\*</sup>, Noah J Kopcho<sup>1</sup>, Po-Kai Hsu<sup>3</sup>,  
7 Chang-Wook Lee<sup>1</sup>, James H. Mapes<sup>2</sup>, Denisse Garza<sup>1</sup>, Srinivasan Krishnan<sup>4</sup>, Garry  
8 P. Morgan<sup>2</sup>, Kevin J. Hendargo<sup>5</sup>, Thomas Klose<sup>6</sup>, Steven D. Rees<sup>1</sup>, Arturo Medrano-  
9 Soto<sup>5</sup>, Milton H. Saier Jr.<sup>5</sup>, Miguel Piñeros<sup>4,7</sup>, Elizabeth A. Komives<sup>8</sup>, Julian I.  
10 Schroeder<sup>3</sup>, Geoffrey Chang<sup>1,9†</sup>, Michael H. B. Stowell<sup>2†</sup>  
11

12  
13 <sup>1</sup>Skaggs School of Pharmacy and Pharmaceutical Sciences, University of California, San Diego, La  
14 Jolla, California, USA.

15  
16 <sup>2</sup>Department of Molecular, Cellular and Developmental Biology, University of Colorado, Boulder,  
17 Colorado, USA.

18  
19 <sup>3</sup>Cell and Developmental Biology Section, Division of Biological Sciences, University of California at  
20 San Diego, La Jolla, California, USA.

21  
22 <sup>4</sup>Boyce Thompson Institute for Plant Research, Ithaca, New York, USA.

23  
24 <sup>5</sup>Molecular Biology Section, Division of Biological Science, University of California, San Diego, La Jolla,  
25 California, USA.

26  
27 <sup>6</sup>Department of Biological Sciences, Purdue University, West Lafayette, Indiana, USA

28  
29 <sup>7</sup>Robert W. Holley Center for Agriculture and Health, United States Department of Agriculture–  
30 Agricultural Research Service, Cornell University, Ithaca, NY, USA.

31  
32 <sup>8</sup>Department of Chemistry and Biochemistry, University of California, San Diego, La Jolla, California,  
33 USA.

34  
35 <sup>9</sup>Department of Pharmacology, School of Medicine, University of California at San Diego, La Jolla,  
36 California, USA.

37  
38 \*These authors contributed equally.

39  
40 †Co-corresponding authors

41  
42 Correspondence to: GC (g1chang@ucsd.edu), MHBS (michael.stowell@colorado.edu).  
43  
44  
45

## 46 **Abstract**

47 Sensing and responding to environmental water deficiency and osmotic stresses is  
48 essential for the growth, development and survival of plants. Recently, an osmolality-  
49 sensing ion channel called OSCA1 was discovered that functions in sensing  
50 hyperosmolality in *Arabidopsis*. Here, we report the cryo-EM structure and function of  
51 an ion channel from rice (*Oryza sativa*; OsOSCA1.2), showing how it mediates  
52 hyperosmolality sensing and ion permeability. The structure reveals a dimer; the  
53 molecular architecture of each subunit consists of eleven transmembrane helices and  
54 a cytosolic soluble domain that has homology to RNA recognition proteins. The  
55 transmembrane domain is structurally related to the TMEM16 family of calcium  
56 dependent ion channels and scramblases. The cytosolic soluble domain possesses a  
57 distinct structural feature in the form of extended intracellular helical arms that is  
58 parallel to the plasma membrane. These helical arms are well positioned to sense  
59 lateral tension on the inner leaflet of the lipid bilayer caused by changes in turgor  
60 pressure. Computational dynamic analysis suggests how this domain couples to the  
61 transmembrane portion of the molecule to open the channel. Hydrogen-deuterium  
62 exchange mass spectrometry (HDXMS) experimentally confirms the conformational  
63 dynamics of these coupled domains. The structure provides a framework to  
64 understand the structural basis of hyperosmolality sensing in an important crop plant,  
65 extends our knowledge of the anoctamin superfamily important for plants and fungi,  
66 and provides a structural mechanism for translating membrane stress to ion transport  
67 regulation.

## 68 **Introduction**

69 Hyperosmolarity and osmotic stress are among the first physiological responses to  
70 changes in salinity and drought. Hyperosmolality triggers increases in cytosolic free  
71  $\text{Ca}^{2+}$  concentration and thereby initiates an osmotic stress-induced signal transduction  
72 cascade in plants (1-3). Salinity and drought stress trigger diverse protective  
73 mechanisms in plants enabling enhanced drought tolerance and reduction of water  
74 loss in leaves.

75  
76 Ion channels have long been hypothesized as sensors of osmotic stress. A candidate  
77 membrane protein named OSCA was isolated in a genetic screen for mutants that  
78 impair the rapid osmotic stress-induced  $\text{Ca}^{2+}$  elevation in plants (1). OSCA1 encodes  
79 a multi-spanning membrane protein that functions in osmotic/mechanical stress-  
80 induced activation of ion currents. However, the underlying mechanisms and whether  
81 OSCA1 itself encodes an ion conducting pore specific for  $\text{Ca}^{2+}$  requires further  
82 analysis. OSCA1 is a member of a larger gene family in *Arabidopsis* with 15 members  
83 (4), and with many homologs encoded in other plants and fungal genomes.  
84 Furthermore, evolutionary analyses have revealed that OSCA is distantly related to  
85 the anoctamin superfamily, that includes the TMEM16 family of calcium dependent ion  
86 channels (5).

## 87 **Results**

88  
89 As we were interested to determine whether and how osmolality caused OSCA  
90 proteins to respond to osmotic stress in crop plants, we screened five such ion  
91 channels from rice, over-expressing them as TEV protease cleavable eGFP fusions  
92 in *Pichia pastoris*. The *Oryza sativa* hyperosmolality-gated protein (annotated as  
93 OsOSCA1.2, GenBank KJ920372.1) was found to have both high levels of protein  
94 expression and desirable properties during purification and was therefore chosen for  
95

96 further characterization. We purified the membrane protein to homogeneity (**Fig. S1A**)  
97 and determined the oligomeric state of purified OSCA using size-exclusion  
98 chromatography coupled to multi-angle laser light scattering (SEC-MALLS) analysis,  
99 revealing the detergent solubilized protein to be a dimer (**Fig. S1B**).

100  
101 **Functional Reconstitution of OsOscA1.2.** Reconstitution of the OsOSCA1.2  
102 purified proteins into droplet interface bilayers (DIBs) indicated the purified protein is  
103 fully functional, mediating ion transport (**Fig. S1C-H**). OsOSCA1.2 was active in  
104 symmetrical (*cis:trans* 150:150 mM KCl) ionic conditions in the absence of any other  
105 osmotically active solutes (**Fig. S1C-E**). In symmetric ionic conditions the current to  
106 voltage relation for OsOSCA1.2 was quite linear, yielding a unitary conductance of  
107  $284 \pm 2$  pS and showing no signs of current rectification. The unitary conductance is  
108 within the range of those reported recently for other OSCA proteins (e.g., between 300  
109 to 350 pS in similar ionic conditions (4). Under non-symmetrical ionic conditions  
110 (*cis:trans* 15:150 mM KCl), with an inwardly directed  $K^+$  gradient, the inward single  
111 channel currents reversed ( $E_{rev}$ ) at about -26mV, closer to the Nernst potential for  $K^+$   
112 ( $E_{K^+}$ : 54 mV after correction for ionic activities), indicating a modest selectivity for  $K^+$   
113 over  $Cl^-$  as suggested by the calculated  $P_{K^+}/P_{Cl^-} = 5 \pm 1$  (**Fig. S1I**). The appearance  
114 of infrequent 50% current amplitude sub-conductance state (**Fig. S1H**) was consistent  
115 with the proposed assembly of two cooperative subunits as confirmed by the dimeric  
116 nature of the OsOSCA1.2 channels inferred from SEC-MALLS (**Fig. S1B**). The result  
117 is also consistent with and other recent studies of OSCA proteins (6, 7). Overall, the  
118 above experiments confirmed functionality of our purified OsOSCA1.2 protein.

119  
120 **Structure of OsOSCA1.2.** We determined a molecular structure of OsOSCA1.2 by  
121 single-particle cryo-electron microscopy to an overall resolution of 4.9 Å and local  
122 resolution in the membrane of 4.5 Å, revealing a dimer of C2 symmetry related  
123 subunits (**Fig. S2**). The overall dimension of the protein are 140 Å x 55 Å x 85 Å. Each  
124 protomer is comprised of eleven transmembrane (TM) spanning segments, associated  
125 extra- and intracellular loops and an intracellular soluble domain (**Fig. 1A**). All eleven  
126 transmembrane helices and the soluble domain are well resolved in our cryo-EM maps  
127 and large side chains provided suitable markers for ensuring proper sequence  
128 registration during atomic model building. (**Fig. S3**). The final atomic model comprises  
129 1388 out of the expected 1424 residues with good geometry and an EMringer (8) score  
130 of 0.89 (**Table S1**).

131  
132 According to the Transporter Classification Database (TCDB) (9), OsOSCA1.2  
133 belongs to what is annotated as the Calcium-permeable Stress-gated Cation Channel  
134 family (CSC; TC: 1.A.17.5) within the Anoctamin Superfamily (TC: 1.A.17). This  
135 classification indicates that OsOSCA1.2 is distantly related to members of the  
136 Anoctamin family (ANO; TC: 1.A.17.1) for which high-resolution 3D structure are  
137 available (10, 11). Following a recently published bioinformatics approach (5), we had  
138 further predicted that OsOSCA1.2 had eleven TMs and the eighth hydrophobicity peak  
139 is composed of two TMs (**Fig. 1B**) based on hydropathy analysis and comparison of  
140 regions with the fungal homolog *Nectria haematococca* TMEM16 (NhTMEM16) (10).  
141 For convenience, we have kept the numbering convention of TMs consistent with  
142 NhTMEM16, and thus we refer to OSCA1.2's additional N-terminal TM as TM0 (**Figs.**  
143 **1C-D**). Despite a relatively low degree of sequence similarity, we later confirmed that  
144 OsOSCA1.2 shares significant structural homology to the TMEM proteins with respect

145 to ten of the eleven transmembrane regions, corresponding to TMs1-10 in the mouse  
146 TMEM16A (mTMEM16A) structures.

147  
148 TM0 threads from the extracellular N-terminal end of the protein through the  
149 membrane, linking to TM1 via a ~50 residue strand that is likely conformationally  
150 flexible. This portion of the protein is the only region not fully resolved in our density  
151 maps (**Figs. 1B-D**). A short helix on the cytoplasmic side then precedes TM1 and the  
152 C-terminal end of TM2 leads into the soluble cytosolic region of ~170 residues. The  
153 remaining helices represent the anoctamin domain, encapsulating the pore region for  
154 ion conductance. TMs3-4 are located on the outer edge of the transmembrane region  
155 and are tilted with respect to the membrane. TMs7-8 are shorter in length and are the  
156 only TMs that do not span the entire length of the membrane, with the connecting loop  
157 (residues 578-583) being embedded in the membrane and consisting of hydrophobic  
158 residues.

159  
160 The soluble domain is located on the intracellular side of the channel joining TM2  
161 and TM3 and makes important structural contacts with the C-terminus (**Figs. 1B-D**).  
162 A core globular domain comprises a four-stranded  $\beta$ -sheet buttressed by two short  
163 helices that interestingly forms a canonical RNA recognition motif (RRM) fold (12).  
164 Unlike true RNA binding RRM proteins, OsOSCA1.2 includes a fusion of a distinct 70-  
165 residue appendage between  $\beta$ -strands 2 and 3. These long, extended helical arms  
166 protrude out from the RRM domain and are located proximal to and in the plane of  
167 what would be the inner-leaflet side of the plasma membrane.

168  
169 The dimer interface represents only a small percentage (~2.7%) of the surface area  
170 of each protomer, burying only ~1116 Å<sup>2</sup> surface area comprised by interactions  
171 formed between the soluble domains (**Figs. 2A-B**) (13). Interface residues Q334,  
172 T335, Q336, Q337, T338, S339, L681, Q682, and E683 from both subunits likely make  
173 several hydrogen bonds and hydrophobic interactions (**Fig. 2C**). Interestingly, the TMs  
174 from each subunit do not cause significant interactions contributing to the dimer  
175 interface. The orientation and offset of the two halves of the dimer creates a large  
176 cavity between the two protomers, which, as predicted in other AtOSCA structures (6,  
177 7, 14), is likely filled with lipids when embedded in the cell membrane.

178  
179 The ion conductance pore of OsOSCA1.2 is contained within each monomeric  
180 subunit (**Fig. 2D**), and formed between TMs 3-7 as suggested by the topological  
181 similarities with mTMEM16A. Using the program HOLE to visualize the putative ion  
182 permeation pathway (15), the overall shape of the pore resembles an hourglass. The  
183 extracellular and an intracellular vestibule are bridged by a narrow neck region that is  
184 about 20 Å long through the membrane. The putative pore has an opening more than  
185 12Å wide towards the extracellular side and narrows into the 'neck' region  
186 approximately 15 Å down the conduction pathway. The tightest juncture is ~0.8 Å wide,  
187 suggesting that this channel structure is in a closed conformation. The calculated pore  
188 profile predicts that the hydrophobic residues F511, F512, and Y515 on TM6 and V472  
189 and Y464 on TM5 forms a gate that completely blocks the channel pore (**Fig. 2E**).

190  
191 **OsOSCA1.2 computational dynamics.** The DynOmics suite allows prediction and  
192 identification of candidate functional sites, signal transduction, and potentially  
193 allosteric communication mechanisms, leveraging rapidly growing structural  
194 proteomics data (16). The suite integrates two widely used elastic network models

195 while taking account of the molecular environment like the lipid bilayer providing  
196 collective dynamics of structural resolved systems. We used DynOmics to do  
197 molecular dynamic simulations on our OsOSCA1.2 dimer model after embedding in  
198 the membrane, looking for regions that could potentially serve as functionally  
199 important sensors, broadcasters, and receivers (**Fig. 3A**). Our results revealed that  
200 the extended intracellular helical arms could communicate conformational  
201 perturbations, having the propensity to act as a broadcaster/receiver, extending to the  
202 central core sheet structure of the soluble domain and, more interestingly, TM6, which  
203 is proposed to be the ion gating helix in related structures (6, 7, 10, 11, 14).

204  
205 **OsOSCA1.2 experimental dynamics.** In order to further understand and probe local  
206 conformational dynamics of OsOSCA1.2, we used HDXMS. This approach utilizes the  
207 exchange that occurs between protons linked to amide bonds and protons or  
208 deuterium nuclei from solvent molecules to provide experimental information  
209 regarding regional solvent accessibility and dynamics. When a protein is added to a  
210 solution containing excess D<sub>2</sub>O, hydrogen-deuterium exchange occurs most rapidly  
211 for protons which are exposed to solvent and unconstrained by intermolecular  
212 hydrogen bonds. Protease digestion and chromatographic separation facilitate the  
213 quantification of deuterium nuclei incorporated throughout the protein as measured by  
214 mass spectrometry (17). For the hydrogen-deuterium exchange to occur in well-folded  
215 regions, a protein must sample exchange-competent conformations which expose  
216 amide protons. Thus, the uptake of deuterium over time reflects the local dynamics  
217 that individual regions of a protein undergo in solution (18).

218  
219 HDXMS measurements using detergent solubilized OsOSCA1.2 protein resulted  
220 in the identification of 32 peptides, which constitute 34.5% coverage of the molecule  
221 (**Figs. 3B and S4A**), including the helical arms that were predicted to dynamically  
222 couple to the presumed gating helix TM6 and most likely to be responsible for sensing  
223 lateral tension in the membrane. The helix closest to the inner leaflet side of the  
224 membrane was covered by two peptides (corresponding to residues 244-257 and 245-  
225 257). Deuterium incorporation profiles revealed that this region was tightly protected  
226 from exchange, indicative of rigid dynamics or association with a nearby surface (**Fig.**  
227 **3C**). The following segment was also covered by two peptides (residues 258-279 and  
228 258-286), which correspond to the C-terminal end of the protected helix and a nearby  
229 loop in our structure. This region was ~25% saturated with deuterium nuclei at the  
230 earliest measured time point of 1 minute, indicating rapid exchange associated with  
231 conformational flexibility. The remainder of this segment increased deuterium content  
232 by ~5% over 5 minutes suggesting conformational motions that gradually increased  
233 exposure to solvent. The helix farther from the membrane was covered by three  
234 peptides (residues 287-320, 289-320, 305-320) and similarly displayed rapidly-  
235 exchanging amides and ongoing deuterium exchange. Mass spectra from peptides  
236 corresponding to the unstructured loop and helix farther from the membrane all  
237 displayed bimodal deuterium uptake, which was more prominent among peptides  
238 corresponding to the loop (**Fig. S4B**). The ongoing dynamics in sharp contrast to the  
239 rigidity of the helix (residues 241-266) closer to the membrane. Despite being spatially  
240 and sequentially near each other, these two intracellular helices have very different  
241 dynamic properties.

242  
243 **Topological insertion of OSCA in tA201 Cells.** As the OSCA family inserts an  
244 addition helix, TM0, we investigated the orientation of the ion channel in the cell

245 membrane in mammalian human embryonic kidney tsA201 cells. The topological  
246 prediction and structures suggested that the N- and C-termini of the molecule were on  
247 opposite sides of the membrane (**Fig. 1B**). We, therefore, made two C-terminal HA-  
248 tagged (YPYDVPDYA) cDNA constructs of OsOSCA1.2 and AtOSCA1 in a pcDNA3.1  
249 vector. Human kidney cell-line tsA201 cells were transfected with both of these  
250 constructs (**Figs. S5A-B**) and, after 48 hours, the cells were stained with anti-HA  
251 antibody conjugated to Alexa488 without permeabilization (see Methods). Our results  
252 suggest that the C-terminus of the molecule was accessible only from outside the cell.

253

254 **Osmotic stress response of OsOSCA1.2.** It was suggested that the orthologs of  
255 OsOSCA1.2 in *Arabidopsis*, AtOSCA1 and AtOSCA1.2, are osmotic stress responsive  
256 cation channels (1, 19). We, therefore, explored whether changes in the intracellular  
257 free  $\text{Ca}^{2+}$  concentration occur in response to osmolality changes in tA201 cells using  
258 a ratiometric fluorescent indicator, Fura-2AM (**Fig. S6**). No obvious differences were  
259 observed between control and OsOSCA1.2-expressing tA201 cells in hypoosmotic  
260 ( $168 \text{ mosmol kg}^{-1}$ ) and hyperosmotic ( $627 \text{ mosmol kg}^{-1}$ ) calcium responses (**Figs.**  
261 **S6A-B**,  $n > 23$  OsOSCA1.2-expressing cells). Rapidly induced fluorescence ratio  
262 changes were observed in response to exogenous ATP in the same OsOSCA1.2-  
263 expressing tA201 cells as controls (**Fig. S6A**), suggesting that Fura-2 can efficiently  
264 report intracellular calcium changes in these experiments.

265

## 266 Discussion

267 OsOSCA1.2 shares overall protein fold and topology with other recently determined  
268 homologous structures from *A. thaliana* (6, 7, 14). A superposition of these structures  
269 with OsOSCA1.2 showed a significant difference (rmsd  $\sim 3\text{-}4\text{\AA}$ ) for the pore-lining  
270 helices (TM3-7) along with TM0 and TM8 (**Fig. 4A**). When comparing intracellular  
271 soluble domains, the extended helical arms of OsOSCA1.2 had noticeable differences  
272 compared to that of AtOSCA1 (**Fig. 4A**). These differences are likely due to a  
273 combination of conformational flexibility inherent in the detergent solubilized protein  
274 and structural difference between species.

275

276 OsOSCA1.2 also shares structural homology to the TMEM family (mTMEM16A,  
277 NhTMEM16) when comparing monomeric transmembrane domain regions. However,  
278 they differ significantly in the regions of extra- and intra-cellular loops and domains as  
279 well as the intermolecular packing arrangement of the respective dimers. The dimer  
280 interface of mTMEM16A buries less surface area ( $\sim 2\%$ ) compared to OsOSCA1.2 and  
281 most of the interactions are mediated through the TM domains. The intracellular  
282 domains of mTMEM16A and NhTMEM16, which are formed by the N and C-termini of  
283 the molecule, do not contribute to the formation of the dimer (**Fig. 4B**). In contrast,  
284 OsOSCA1.2 dimerizes mostly through interactions formed between the opposing  
285 intracellular soluble domains. This distinct dimeric packing resulted in a more  
286 pronounced offset between protomers, that is  $\sim 20 \text{\AA}$  wider for OsOSCA1.2 compared  
287 to NhTMEM16 or mTMEM16A. In our OsOSCA1.2 structure, the extended helical arm  
288 in the intracellular soluble domain make hydrophobic contacts with the loop connecting  
289 the gating helix TM6 (**Fig. 4C**), suggesting a possible role for the helical 'arms' in  
290 sensing the membrane tension and, in turn, transmitting these  
291 conformational/mechanical changes to gate ion conductance (**Fig. 4D**). This feature  
292 is, of course, missing in TMEM16 channels as  $\text{Ca}^{2+}$  ions control gating.

293

294 Our OsOSCA1.2 structure likely represents the non-conducting state conformation  
295 as no tension, pressure or osmolality mismatch was applied between the intracellular  
296 and extracellular sides of the OsOSCA1.2 protein during cryo-EM sample preparation.  
297 Indeed, the tightest juncture in the pore is  $\sim 0.8$  Å wide (**Fig. 2D-E**). Our DIBs study  
298 suggests that the reconstituted OsOSCA1.2 protein could conduct ions (**Fig. S1E**).  
299 Interestingly, when the OsOSCA1.2 structure was compared to mTMEM16A, we  
300 found a  $\pi$ -helical turn at TM6 near the 'neck' region of the pore that might be  
301 associated with ion gating and channel opening in a similar fashion ( $\text{Ca}^{2+}$  activated  $\pi$ -  
302 to- $\alpha$  transition) to that observed in mTMEM16A (11, 20). The regulatory  $\text{Ca}^{2+}$  binding  
303 site composed of acidic and polar residues (E702 and E705 from TM7, E734, and  
304 D738 from TM8, and N651 and E654 from TM6 in mTMEM16A) are well conserved in  
305 the TMEM16 family (**Fig. 4E**). However, when compared to the corresponding same  
306 region in OsOSCA1.2, the negatively charged residues D519 and E527 on TM6 and  
307 polar residue R568 on TM7 locate spatially different (**Fig. 4F**). Therefore, OsOSCA1.2  
308 will likely not specifically bind calcium ions in this region.

309  
310 Computational dynamic studies using our OsOSCA1.2 model and experiments  
311 using hydrogen-deuterium exchange with detergent solubilized OsOSCA1.2 protein  
312 provided a molecular structural basis of how OsOSCA1.2 couples osmotic stress to  
313 induce ion channel gating in the membrane spanning region. Taken together, both  
314 studies predict and suggest that the extended helical arms (residues 241-266) have  
315 the mechanical rigidity and propensity to act as a broadcaster/receiver, transmitting  
316 conformational changes caused by lateral tension in the membrane to TM6 (**Figs. 3,**  
317 **4F**), which is important for gating ion conductance. In addition, information from  
318 HDXMS revealed the presence of bimodal deuterium exchange throughout the  
319 OsOSCA1.2 (**Figs 3B-C and S4B**), most prominently within the helical arms (residues  
320 258-320) and some extracellular loops (residues 489-511). Bimodal exchange is  
321 indicative of multiple correlated unfolding processes occurring in the observed regions  
322 (21). Interestingly, in each peptide where bimodal peaks were observed, the two peaks  
323 remained equal in intensity over the entire course of the experiment, suggesting at  
324 least two distinct conformational states occupied by the molecular ensemble at  
325 equilibrium in the resting state.

326  
327 Several electrophysiological studies have used mammalian cells over-expressing  
328 OSCA channels to measure conductance gated by direct mechano-transduction or  
329 pressure (1, 4, 6). Interestingly, we found that the C-terminus and presumably the  
330 entire cytosolic domain (residues 191-363) were on the outside when OSCA channels  
331 were over-expressed in mammalian cells (**Fig. S5**). This finding suggests and could  
332 explain why channel opening due to changes in ion concentration may be impaired.  
333 As previous studies suggested  $\text{Ca}^{2+}$  conductance, we further probed ion flux using  
334 FURA2 using these cells as proxy for calcium but found no changes relative to controls  
335 for either hyper- or hypo-osmotic conditions (**Fig. S6**). It remains unclear whether or  
336 not these ion channels can be gated by changes in ion concentration. Interestingly,  
337 analysis of the taxonomic distribution of different OSCA fragments suggests that TM0  
338 is restricted to plants and that the cytosolic domain (residues 191-363; cytoL2) is  
339 probably distributed similarly to the rest of OSCA family (**Fig. S7-9 and Table S1**). In  
340 fungi and plants, the N-terminus of TM0 is predicted to be on the outside with the  
341 osmo-sensing cytosolic domain inside the cell (**Fig. 1B**). OSCA may be inserted in the  
342 membrane differently between mammalian and plant/fungi cells and may be an  
343 important consideration in their functional study.

344

345 Several important questions remain regarding these OSCA channels and their role  
346 in crops. For example, the specificity of endogenous ions conducted by OsOSCA1.2  
347 or by other members within their greater family is still unknown. It will certainly be a  
348 challenge to assign function to all of these proteins individually as these channels are  
349 members of large gene families. Although we present a structure of OsOSCA1.2 along  
350 with computational and experimental dynamics, the detailed function mechanism(s)  
351 coupling lateral tension in the membrane by OsOSCA1.2 to channel gating remains to  
352 be addressed in future studies. These studies will certainly be challenging given the  
353 transient nature of channel gating.

354

355 **Acknowledgments:** We thank Valorie D. Bowman for assistance during data  
356 collection at the Purdue Cryo-EM facility supported by NIGMS grant U24 GM116789.  
357 This work was funded by NSF PGRP IOS-1444435 and in part supported by the  
358 National Institute of Health (GM060396).

359



## 360 **Methods**

361

362 **Expression and Purification of OsOSCA1.2.** We cloned OsOSCA1.2 (GenBank  
363 KJ920372.1) and made TEV protease cleavable green fluorescent protein (GFP)  
364 fusions into the pPICZc vector, and tested expression in *Pichia pastoris*. Expression  
365 vectors were linearized using *PmeI* and electroporated into competent *P. pastoris*  
366 KM71H cells (Life Technology). The resulting transformants were cultured and  
367 induced in small scale to screen for target expression based on the intrinsic GFP  
368 fluorescence of cells and also from an anti-His western blot of whole cell lysate.  
369 OsOSCA1.2 was found to show both high levels of expression, and desirable  
370 properties during purification (described below) and was therefore chosen for further  
371 characterisation. Yeast clones selected for their high expression of OsOSCA1.2 were  
372 grown in minimal glycerol (4%) media, supplemented with 0.4% phosphoric acid and  
373 0.024% trace metals at 28°C in a New Brunswick BioFlo 415 (Eppendorf). The pH of  
374 the media was titrated to pH 5 prior to inoculation and adjusted during the vegetative  
375 growth phase using 50% ammonium hydroxide. The dissolved oxygen (DO) was  
376 maintained at 10% minimally through-cascaded agitation until a DO spike occurred.  
377 The fermentation culture was then induced at pH 5 by slow methanol addition for 16-  
378 18 hours.

379

380 Cells were harvested and resuspended in cold lysis buffer (20 mM Tris-HCl pH 8.0,  
381 100 mM NaCl, 15% glycerol, 23.4 mM leupeptin, 7 mM E-64, 4 mM chymostatin, 14.5  
382 mM pepstatin A, 1 mM PMSF, 25 mM benzamidine), and they were lysed by a single  
383 passage through a cell disruptor (TS-Series, Constant Systems, Inc.) at 40,000 psi.  
384 Cellular debris were removed by centrifugation (12,500 x g, 20 minutes, 4°C) and the  
385 supernatant continued onto a 38,400 x g spin for 4 hrs to fractionate the plasma  
386 membrane. The membrane fraction was resuspended in lysis buffer and frozen at -  
387 80°C.

388

389 Membranes were solubilized with 1% n-dodecyl- $\beta$ -D-maltopyranoside (DDM) and  
390 0.1% sodium cholate for ~90 min at 4°C. Insoluble material was removed by  
391 centrifugation (38,400 x g, 4 °C for 60 minutes) and 15 mM imidazole was added to  
392 the supernatant before batch binding to Ni-NTA agarose resin (Qiagen). The bounded  
393 resin was sequentially applied to a gravity column housing and washed with buffer A  
394 (20 mM HEPES pH 8.0, 150 mM NaCl, and 0.03% DDM, 0.003% cholesteryl  
395 hemisuccinate) and an imidazole gradient was applied. Bound target protein was  
396 eluted with buffer A containing 300 mM imidazole, concentrated to ~8 mL, desalted  
397 (HiPrep 26/10, GE Healthcare) and subjected to TEV protease digestion for 12 hours  
398 at 4°C. TEV digested sample was reapplied to Ni agarose (Qiagen) to rebind the TEV  
399 protease and the C-terminal His-GFP tag. The collected OsOSCA1.2 was then  
400 concentrated to ~1 mL and ultraspun at 95,000 rpm (TLA120.1 rotor) for 15 minutes  
401 at 4°C. The sample was then applied to a Superdex 200 increase size-exclusion  
402 column (GE Healthcare) pre-equilibrated with 20 mM HEPES pH 8.0, 150 mM NaCl,  
403 0.06% n-undecyl- $\beta$ -D-maltopyranoside 0.2 mM tris(2-carboxyethyl)phosphine, and  
404 0.01% cholesteryl hemisuccinate, and run at 4°C. Peak fractions off the size-  
405 exclusion chromatography column were checked using sodium dodecyl sulfate  
406 polyacrylamide gel electrophoresis (SDS-PAGE) and directly snap frozen at a  
407 concentration of ~3 mg/mL.

408

409 **Determination of the molecular mass of OsOSCA1.2 using SEC-MALLS.** Size-  
410 exclusion chromatography coupled to multi-angle laser light scattering (SEC-MALLS)  
411 was performed using a Superdex 200 Increase 10/300 GL size exclusion column (GE  
412 Life Sciences) connected in series to a miniDAWN TREOS light scattering detector  
413 and an Optilab T-rEX refractive index detector (Wyatt Technology, Santa Barbara, CA,  
414 USA). Purified OsOSCA1.2 was injected onto the column with 20 mM HEPES pH 8.0,  
415 150 mM NaCl, 0.03% *n*-dodecyl- $\beta$ -D-maltopyranoside, 0.2 mM TCEP, 0.001% sodium  
416 cholate and 0.02% cholesteryl hemisuccinate and run at 0.4 mL/min. The elution was  
417 monitored in-line with three detectors, and the molecular weights of the protein-micelle  
418 complex, the micelle and the protein were calculated using ASTRA v.6 software (Wyatt  
419 Technology) in conjugate mode as previously described (22).

420  
421 **Functional reconstitution of OsOSCA 1.2 into droplet interface bilayers (DIBs).**  
422 Lipids of *E. Coli* extract polar (Avanti #100600) were dried under nitrogen and vacuum  
423 desiccated for one hour, before resuspending in reconstitution buffer (10 mM HEPES,  
424 pH 7.4, 150 mM KCl) to a final concentration of 10 mg/ml. The resuspended lipids  
425 were incubated for a minimum of 20 min followed by addition of 0.1% DM. The mixture  
426 was allowed to sit at room temperature for 30 min followed by bath sonication for 5  
427 cycles of 1 minute sonication and 2 min on ice. Purified OsOSCA1.2 was then mixed  
428 at a protein-lipid ratio of 1:500 (w/w) with the detergent saturated liposomes. The  
429 protein was reconstituted by removal of detergents by the detergent-dilution method  
430 (23). OsOSCA1.2 containing proteoliposomes were resuspended to a final lipid  
431 concentration of ~5mg/ml, extruded through a 100 nm filter, and stored at -80°C until  
432 use. Ion channel reconstitution into droplet interface bilayers (DIBs) was done as  
433 detailed elsewhere (24-26). Briefly, a lipid asymmetric droplet-droplet (~200 nl)  
434 configuration (27) was obtained by placing OsOSCA1.2 containing proteoliposomes  
435 in *E. coli* extract polar lipids on the agar coated head-stage Ag electrode and POPC:  
436 POPS: DOPA (1:1:0.5; Avanti #850457, #840034, #840875) liposomes on the  
437 reference electrode. The droplets were incubated in a hexadecane (Sigma # H6703)  
438 medium for 5-10 min to allow formation of monolayers on each droplet. The two  
439 droplets were then brought into contact with each other and the formation of bilayers  
440 was monitored using a triangular wave protocol. Incorporation of ion channels into the  
441 bilayer were detected as discrete fluctuations in current amplitude under voltage clamp  
442 conditions. Data were acquired using a Dagan 3900A amplifier and pCLAMP 10  
443 software (Molecular Devices, Sunnyvale, CA). Data were filtered at 1 kHz and sampled  
444 at 250 kHz and using a Digidata 1440A. Downward deflections traces represent inward  
445 currents (*cis* to *trans*), whilst upward deflections represent outward currents (*trans* to  
446 *cis*). Single channel data analysis was performed using Clampfit 10 (Molecular  
447 Devices). The cation ionic concentrations of all solutions were verified experimentally  
448 via conductively coupled plasma emission spectrometry and their ionic activities were  
449 calculated using GEOCHEM-EZ (28). All experiments were performed at room  
450 temperature.

451  
452 **EM Data Collection.** Quantifoil 1.2/1.3 Au(Quantifoil Micro Tools GmbH, Germany)  
453 or C-Flat 1.2/1.3 300 (Protochips, Raleigh, NC) mesh grids were glow discharged for  
454 30 seconds at 110mA (Emitech). Four microliters of OSCA1.2 at a concentration of  
455 1.8 mgs/ml was applied to the grids, blotted for 2.5s at a relative humidity of 100% and  
456 plunge frozen in liquid ethane using a FEI Vitrobot Mark 2 (FEI Company, Hillsboro,  
457 OR). Two image sets were collected. The first data set was collected using defocus  
458 phase contrast on an FEI Tecnai F30 microscope(FEI Company, Hillsboro, OR)

459 operating at 300kV with a K2 Summit camera(Gatan, Inc., Pleasanton, CA) at a  
460 nominal magnification 31,000x in super resolution mode with a pixel size of 0.636Å  
461 using SerialEM software(Mastronarde Group, Boulder, CO). A total of 40 frames at  
462 200 ms per frame were recorded for each image at a camera dose rate of 8  
463 electrons/pixel/s. A total of 342,910 particles covering a defocus range from -0.8 to -  
464 2.8 microns were used to determine an initial 6.0 Å resolution map that was utilized to  
465 build a poly alanine model (**Table 1**). A higher resolution data set was collected using  
466 a FEI Titan Krios equipped with a Volta Phase Plate, GatanEnergy Filter and a K2  
467 summit camera (Gatan, Inc., Pleasanton, CA). Data were collected at a nominal  
468 magnification of 105,000x in super resolution mode and a total of 64,096 individual  
469 particle images at a fixed target defocus of -0.5 micron defocus were used to  
470 determine the structure at 4.9 Å resolution (**Table 1 and Fig. S2**).

471  
472 **EM Data Processing.** The Tecnai F30 data set consisted of a total of 9,691  
473 micrographs in 3 groups were selected for initial processing after motion correction  
474 using MotionCor2 and CTF estimation with Gctf. Non dose-weighted micrographs  
475 were used for CTF estimation, and dose-weighted micrographs for all other  
476 processing. Approximately 1,000 manually picked particles from each group were  
477 used to generate 2X binned templates (2.542 Å pixel size) which were used for  
478 autopicking in Relion. Micrographs. Autopicked particles were manually screened, and  
479 499,167 particles extracted for further processing in cryoSPARC. 2D classification and  
480 selection yielded 342,910 particles which were then used for initial model construction  
481 and auto-refinement. Auto-refinement and masking with C2 symmetry yielded a map  
482 with 6.0 Å resolution by GSFSC corrected for the effects of masking. Local resolution  
483 estimation in cryoSPARC indicated that the core regions have resolutions ranging  
484 from 4.5 Å to 6.0 Å.

485  
486 The Titan Krios data set consisted of a total of 2,408 micrographs that were motion  
487 corrected using MotionCor2 and CTF's estimated using Gctf. Results were imported  
488 into Relion 2.1, A total of 1,126 corrected micrographs were selected for further  
489 processing after screening for excessive motion, and poor or poorly estimated CTF's.  
490 1,134 particles were manually picked, classified in 2D, and the selected templates  
491 used to auto-pick 372,278 particles. Further screening resulted in selection of 650  
492 micrographs containing 169,655 particles for additional processing. 2X binned (2.76 Å  
493 pixel size) particles were extracted and processed through 2 rounds of 2D  
494 classification and selection, resulting in 64,096 remaining particles. 3D auto-  
495 refinement with C2 symmetry using these particles and an initial model from the  
496 previous defocus contrast refinement yielded a model with 7.4 Å resolution. Re-  
497 extraction with unbinned pixels and subsequent refinement led to no improvement in  
498 resolution at this stage. 3D classification into 10 classes and subset selection yielded  
499 5 subsets (best single class, best 2 classes, best 5 classes, and all classes) which  
500 were used for another round of re-extraction and auto-refinement. The best resolution  
501 resulted from using all 64,096 particles and was unchanged at 7.4 Å. Masking and  
502 post-processing resulted in an estimated resolution of 6 Å. At this point, the 64,096  
503 extracted particles were transferred to cryoSPARC, and subsequent processing  
504 performed in cryoSPARC. 3D auto-refinement with C2 symmetry using all 64,096  
505 particles and an initial model constructed using a subset of 16,438 selected particles  
506 resulted in an GSFSC estimated resolution of 4.9 Å. The auto-refined, unsharpened  
507 map was further sharpened with a B-factors ranging from -350 to -600 out to a cutoff

508 of 3.5 Å for modelling and a map with a B-factor of -530 was used for subsequent  
509 model building and refinement.

510  
511 **Model building and Refinement.** An initial polyalanine model was built using the 6.0  
512 Å resolution map with multiple rounds of real space refinement in Phenix/COOT (29,  
513 30). In order to determine the absolute hand at this resolution, the initial and inverted  
514 model were used for molecular replacement using X-ray diffraction data set that  
515 extended to 9 Å in resolution. Only one model provided a solution to the MR search.  
516 Subsequent use of this initial model and the observation of the helical hand in the 4.9  
517 Å resolution map further confirmed the correctness of the assigned hand. The full  
518 atomic model was built into the higher resolution map using multiple rounds of building  
519 and real-space refinement in COOT and Phenix. The density maps within the  
520 transmembrane region were of sufficient quality to readily identify large aromatic side  
521 chains (**Fig. S3**) and helped to confirm the correct sequence registration. Comparison  
522 to the recently determined structures of the AtOSCA1.2 (6, 14) further confirmed the  
523 correctness of our model despite the lower calculated overall resolution of our map.

524  
525 **Image Processing.** Motion-corrected projections with pixel size 1.271 Å (F30) and  
526 1.384 Å (Titan Krios), with and without dose-weighting, were constructed using  
527 MotionCor2 (31) with 2X binning and grouping. The CTF estimation was performed  
528 using Gctf (32) followed by manual selection to remove micrographs with poor or  
529 incorrectly fit CTF, poor astigmatism and contamination. Manual and semi-automated  
530 particle picking was done using RELION 2.1 (33), followed by sorting and another  
531 round of manual over-reading to remove low quality micrographs. Subsequent  
532 refinements were carried out in RELION or cryoSPARC (34). Local resolution  
533 estimation was performed using cryoSPARC or ResMap (35).

534  
535 **Hydrogen-deuterium exchange mass spectrometry (HDXMS).** HDXMS  
536 measurements were made using a Synapt G2Si system (Waters Corporation).  
537 Deuterium exchange reactions were carried out by a Leap HDX PAL autosampler  
538 (Leap Technologies, Carrboro, NC). Deuterated buffer was prepared by lyophilizing  
539 10 mL of 20 mM HEPES, pH 8.0, and 150 mM NaCl. Lyophilized buffer was  
540 resuspended in 10 mL of 99.96% D<sub>2</sub>O immediately before use, to which was added  
541 powdered *n*-undecyl-β-D-maltopyranoside to a final concentration of 0.06% and  
542 cholesterol hemisuccinate to a final concentration of 0.01%. Each deuterium exchange  
543 time point (0 min, 1 min, 2.5 min, 5 min) was measured in triplicate. For each  
544 measurement, 4 μL of protein at a concentration of 5 μM was mixed with 36 μL of D<sub>2</sub>O  
545 buffer at 25 °C. Deuterium exchange was quenched by combining 35 μL of the  
546 deuterated sample with 65 μL of 0.1% formic acid and 3M guanidinium-HCl for 1 min  
547 at 1 °C. The quenched sample was then injected in a 50 μL sample loop and digested  
548 by an inline pepsin column (Pierce, Inc.) at 15 °C. The resulting peptides were  
549 captured on a BEH C4 Vanguard precolumn at a flow rate of 400 μL/sec, separated  
550 by analytical chromatography (Acquity UPLC BEH C4, 1.7 μM, 1.0 × 50 mm, Waters  
551 Corporation) using 7–85% acetonitrile in 0.1% formic acid over 7.5 min, and analyzed  
552 in a Waters Synapt G2Si quadrupole time-of-flight mass spectrometer following  
553 electrospray injection.

554  
555 Data were collected in Mobility, ESI+ mode, mass acquisition range of 200–2000  
556 (m/z), scan time 0.4 s. Continuous lock mass correction was performed using infusion  
557 of leu-enkephalin (m/z = 556.277) every 30 seconds (mass accuracy of 1 ppm for

558 calibration standard). For peptide identification, data were collected in MS<sup>E</sup> (mobility  
559 ESI+) mode. Peptide masses were identified following triplicate analysis of 10 μM  
560 OsOSCA1.2, and the data were analyzed using PLGS 2.5 (Waters Corporation).  
561 Peptide masses were identified using a minimal number of 250 ion counts for low  
562 energy peptides and 50 ion counts for their fragment ions. The following parameters  
563 were used to filter peptide sequence matches: minimum products per amino acid of  
564 0.2, minimum score of 7, maximum MH<sup>+</sup> error of 5 ppm, and a retention time RSD of  
565 5%, and the peptides had to be present in two of the three ID runs collected. After  
566 identification in PLGS, peptides were analyzed in DynamX 3.0 (Waters Corporation).  
567 Deuterium uptake for each peptide was calculated by comparing the centroids of the  
568 mass envelopes of the deuterated samples with the undeuterated controls. To account  
569 for back-exchange and systematic autosampler sample handling differences, the  
570 uptake values measured at the 1 min time point were divided by 0.79. The longer 2.5  
571 min and 5 min deuteration time point deuteration values were divided by 0.75. Data  
572 were plotted as number of deuterons incorporated vs time. The Y-axis limit for each  
573 plot reflects the total number of amides within the peptide that can possibly exchange.  
574 Each plot includes the peptide MH<sup>+</sup> value, sequence, and sequential residue  
575 numbering.

576  
577 **Production of OsOSCA1.2/AtOSCA1 stable expression cell-line.** An epitope HA  
578 tag (YPYDVDPDYA) was introduced onto the 5' end (HA-OsOSCA1.2) or the 3' end  
579 (OsOSCA1.2-HA, AtOSCA1-HA) of the full-length OsOSCA1.2 or AtOSCA1 cDNAs  
580 by PCR. The cDNA was amplified using the *PfuUltra II* Fusion HS DNA Polymerase  
581 (Agilent Technologies, Inc., Santa Clara, CA). PCR products were then subcloned into  
582 the pCDNA3.1 vector (Thermo Fisher Scientific, Waltham, MA). The cDNA inserts were  
583 verified by sequencing (GENEWIZ, South Plainfield, NJ). After linearization of the  
584 vectors with *Pvu I* enzyme, the vectors were transfected to tsA201 cells (ECACC)  
585 using Lipofectamine LTX with Plus Reagent (Thermo Fisher Scientific, Waltham, MA).  
586 Stable cell-lines were selected 48 h post-transfection with 1mg/ml of Geneticin  
587 (Thermo Fisher Scientific, Waltham, MA).

588  
589 **Immunofluorescence assay.** OsOSCA1.2/AtOSCA1 expressing cells were plated on  
590 poly-L-lysine-coated glass coverslips in 24-well plates. After 48 hours, cells were fixed  
591 with 4% paraformaldehyde/PBS. And then cells were blocked with 3% BSA/PBS for  
592 30 min. Expression of OsOSCA1.2/AtOSCA1 were detected with Alexa Fluor 488 anti-  
593 HA (16B12) antibody (BioLegend, San Diego, CA) in PBS, 1% BSA/PBS for 1 h.  
594 Samples were visualized on a fluorescence microscope (EVOS Cell Imaging Systems,  
595 Thermo Fisher Scientific).

596  
597 **[Ca<sup>2+</sup>]<sub>i</sub> Imaging in tA201 Cells.** Intracellular Ca<sup>2+</sup> concentration changes in tA201 cells  
598 in were observed using the ratiometric Ca<sup>2+</sup> indicator dye, Fura-2 (36). The  
599 mammalian cells were transfected with the *pCDNA3.1* (control) or the *pCDNA3.1-*  
600 *OsOSCA1.2-HA* vector were cultured on poly-L-lysine coated glass bottom 35 mm  
601 dish for 16 to 24 hrs. Cells were loaded with 5 μM Fura-2AM (F1221, Invitrogen,  
602 Eugene, OR) in loading buffer (~286 mosmol kg<sup>-1</sup>; 130 mM NaCl, 3 mM KCl, 0.6 mM  
603 MgCl<sub>2</sub>, 0.1 mM CaCl<sub>2</sub>, 10 mM glucose, 10 mM HEPES, adjusted to pH 7.4 with NaOH)  
604 and kept in the dark for 45 min, washed twice by assay buffer (~286 mosmol kg<sup>-1</sup>; 130  
605 mM NaCl, 3 mM KCl, 0.6 mM MgCl<sub>2</sub>, 2 mM CaCl<sub>2</sub>, 10 mM glucose, 10 mM HEPES,  
606 and adjusted pH to 7.4 by NaOH) for 5 min each time, and then incubated with 1 mL  
607 assay buffer for Ca<sup>2+</sup> imaging. For hypoosmotic treatments, 1 mL hypertonic buffer (3

608 mM KCl, 0.6 mM MgCl<sub>2</sub>, 2 mM CaCl<sub>2</sub>, 10 mM glucose, 10 mM HEPES, and adjusted  
609 to pH 7.4 using NaOH) was added into the original 1 mL assay buffer resulting in a  
610 final osmolality ~168 mosmol kg<sup>-1</sup> of the incubation buffer. For ATP treatments, 20 µl  
611 of 1 mM ATP was added into the 2 mL ~168 mosmol kg<sup>-1</sup> incubation buffer resulting a  
612 final ATP concentration of 10 µM. For hyperosmotic treatments, 1 mL of hypertonic  
613 buffer (650 mM sorbitol, 130 mM NaCl, 3 mM KCl, 0.6 mM MgCl<sub>2</sub>, 2 mM CaCl<sub>2</sub>, 10  
614 mM glucose, 10 mM HEPES, and adjusted to pH 7.4 with NaOH) was added resulting  
615 in a final osmolarity ~627 mosmol kg<sup>-1</sup> in the incubation buffer. The osmotic  
616 concentrations of the buffers were determined by using a Wescor 5500 Vapor  
617 Pressure Osmometer. Time-resolved Fura-2 imaging was performed using an Eclipse  
618 TE300 inverted microscope equipped with a Plan Fluor 40x/1.30 Oil objective DIC H  
619 ∞/0.17 WD 0.2 (Nikon, Tokyo, Japan), a ET-Fura2 filter set 79001 (EX340x, EX380x,  
620 ET510/80m; Chroma, Bellows Falls, VT), a Mac 2002 System automatic controller, a  
621 Cool SNAP HQ camera (Photometrics, Tucson, AZ), and guided by the MetaFluor  
622 software version 7.0r3 (Molecular Devices, Sunnyvale, CA). Fluorescence images  
623 excited at 340 nm or 380 nm were collected at 200 ms exposure every 5 seconds.  
624 Emission ratios for 340/380 nm excitations in cells were processed and analyzed using  
625 Fiji (37).

626

#### 627 **Data availability**

628 Cryo-EM maps of OsOSCA1.2 has been deposited to the Electron Microscopy Data  
629 Bank under accession codes XXXX and XXXX. Atomic coordinates of OsOSCA1.2  
630 have been deposited in the PDB under ID XXXX. All other data are available upon  
631 request to the corresponding author(s).

632

| <b>Table 1. Cryo-EM data collection, 3D reconstruction and model building</b>       |                                                |                                                |
|-------------------------------------------------------------------------------------|------------------------------------------------|------------------------------------------------|
| <b>Data Collection and Processing</b>                                               |                                                |                                                |
| Microscope                                                                          | FEI Tecnai F30                                 | FEI Titan Krios                                |
| Voltage (kV)                                                                        | 300                                            | 300                                            |
| Camera (mode)                                                                       | Gatan K2 Summit<br>(40 frame super-res movies) | Gatan K2 Summit<br>(40 frame super-res movies) |
| Target Defocus ( $\mu\text{m}$ )                                                    | -0.8 to -2.8                                   | -0.5<br>Volta Phase Plate                      |
| Pixel size ( $\text{\AA}$ )                                                         | 0.6355                                         | 0.6920                                         |
| Imposed symmetry                                                                    | C2                                             | C2                                             |
| Electron dose ( $\text{e-}/\text{\AA}^2$ )                                          | 45.5                                           | 40.8                                           |
| Initial particle images                                                             | 499,157                                        | 169,655                                        |
| Final particle images                                                               | 342,910                                        | 64,096                                         |
| Map resolution ( $\text{\AA}$ ) FSC 0.143<br>Max local resolution ( $\text{\AA}$ )  | 6.0 $\text{\AA}$<br>4.8 $\text{\AA}$           | 4.9 $\text{\AA}$<br>4.5 $\text{\AA}$           |
| <b>Model Building and Refinement</b>                                                |                                                |                                                |
| Map sharpening B factor ( $\text{\AA}^2$ )                                          | -800                                           | -530                                           |
| Protein residues (expected)                                                         | 1388 (1424)*                                   | 1388 (1424)                                    |
| R.M.S. Z score<br>Bond Lengths (# Z>2)<br>Bond Angles (# Z>2)                       |                                                | 0.30 (2)<br>0.44 (6)                           |
| Validation<br>MolProbity score<br>Clashscore<br>EMRinger score<br>Poor rotamers (%) |                                                | 1.98<br>7.99<br>0.89<br>0.00                   |
| Ramachandran plot<br>Favored (%)<br>Outliers (%)                                    |                                                | 90.1<br>0.0                                    |

633

634 **Figure 1**

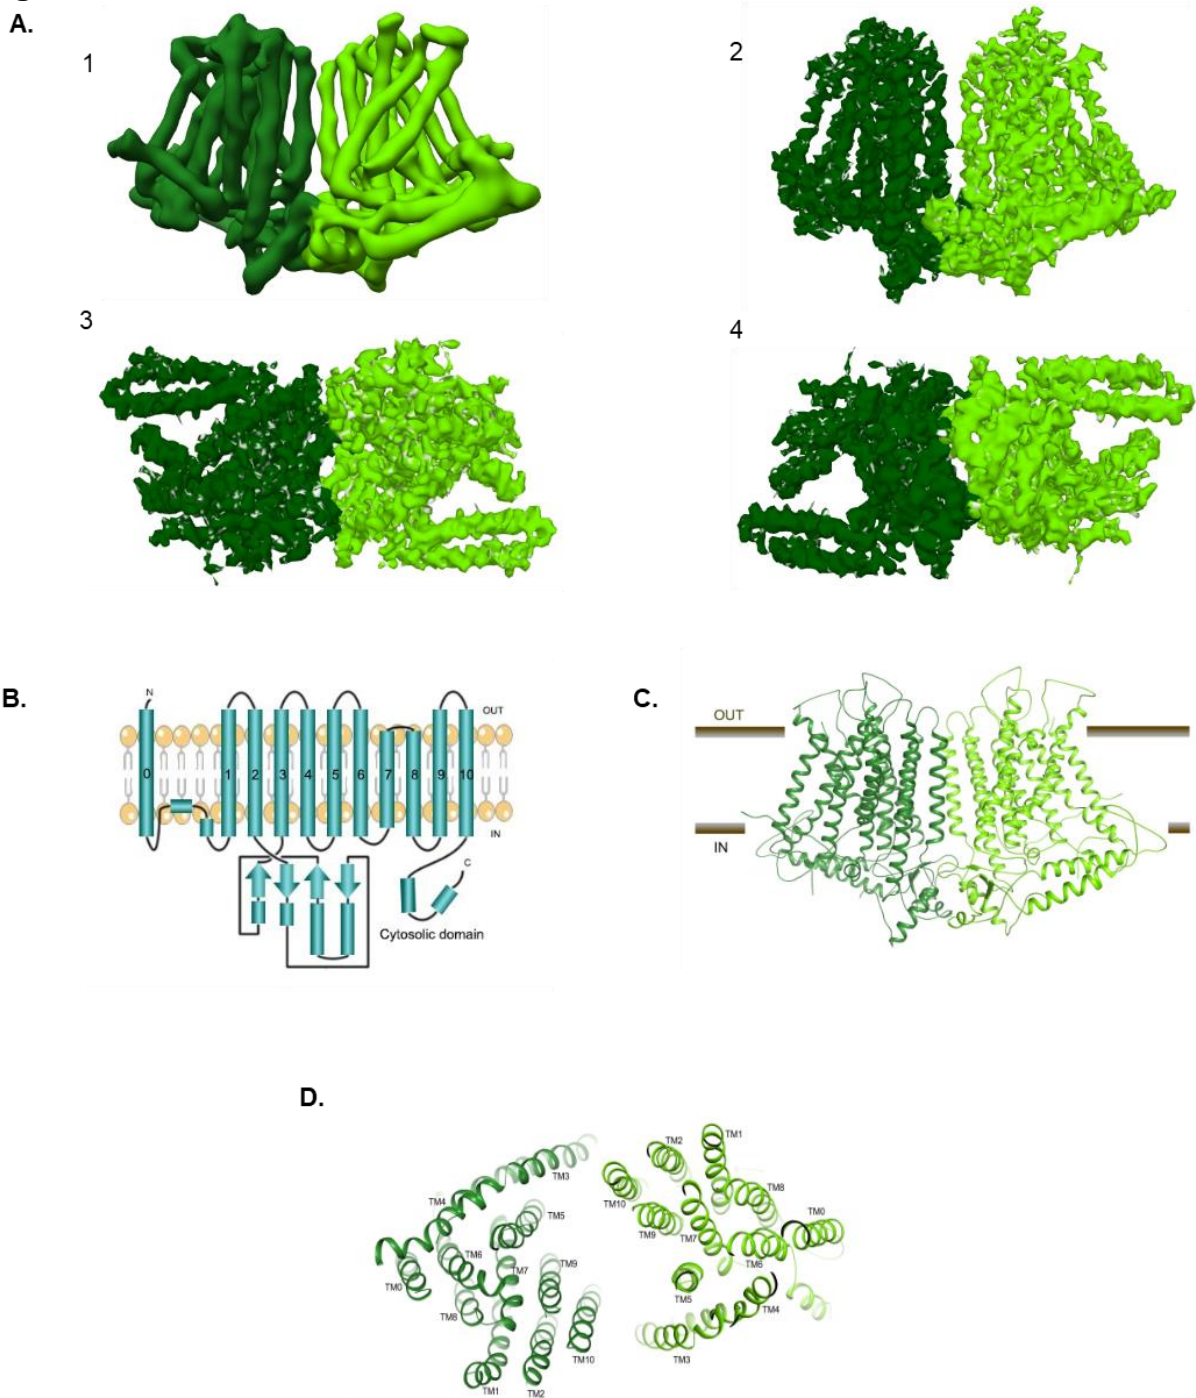

635  
636  
637  
638  
639  
640  
641  
642

**Figure 1. Cryo-EM structure of the OsOSCA1.2 ion channel.** (A) From left to right, (1) Parallel to membrane plane view of unsharpened cryoEM density map used for initial chain tracing, (2-4) sharpened 4.9 Å map used for model building and refinement: (2) membrane plane view, (3) extracellular view, and (4) intracellular view. (B) Protein topology of OsOSCA1.2. View of OsOSCA1.2 model from (C) the plane of the cell membrane and (D) from the extracellular side.



643 **Figure 2**  
644  
645

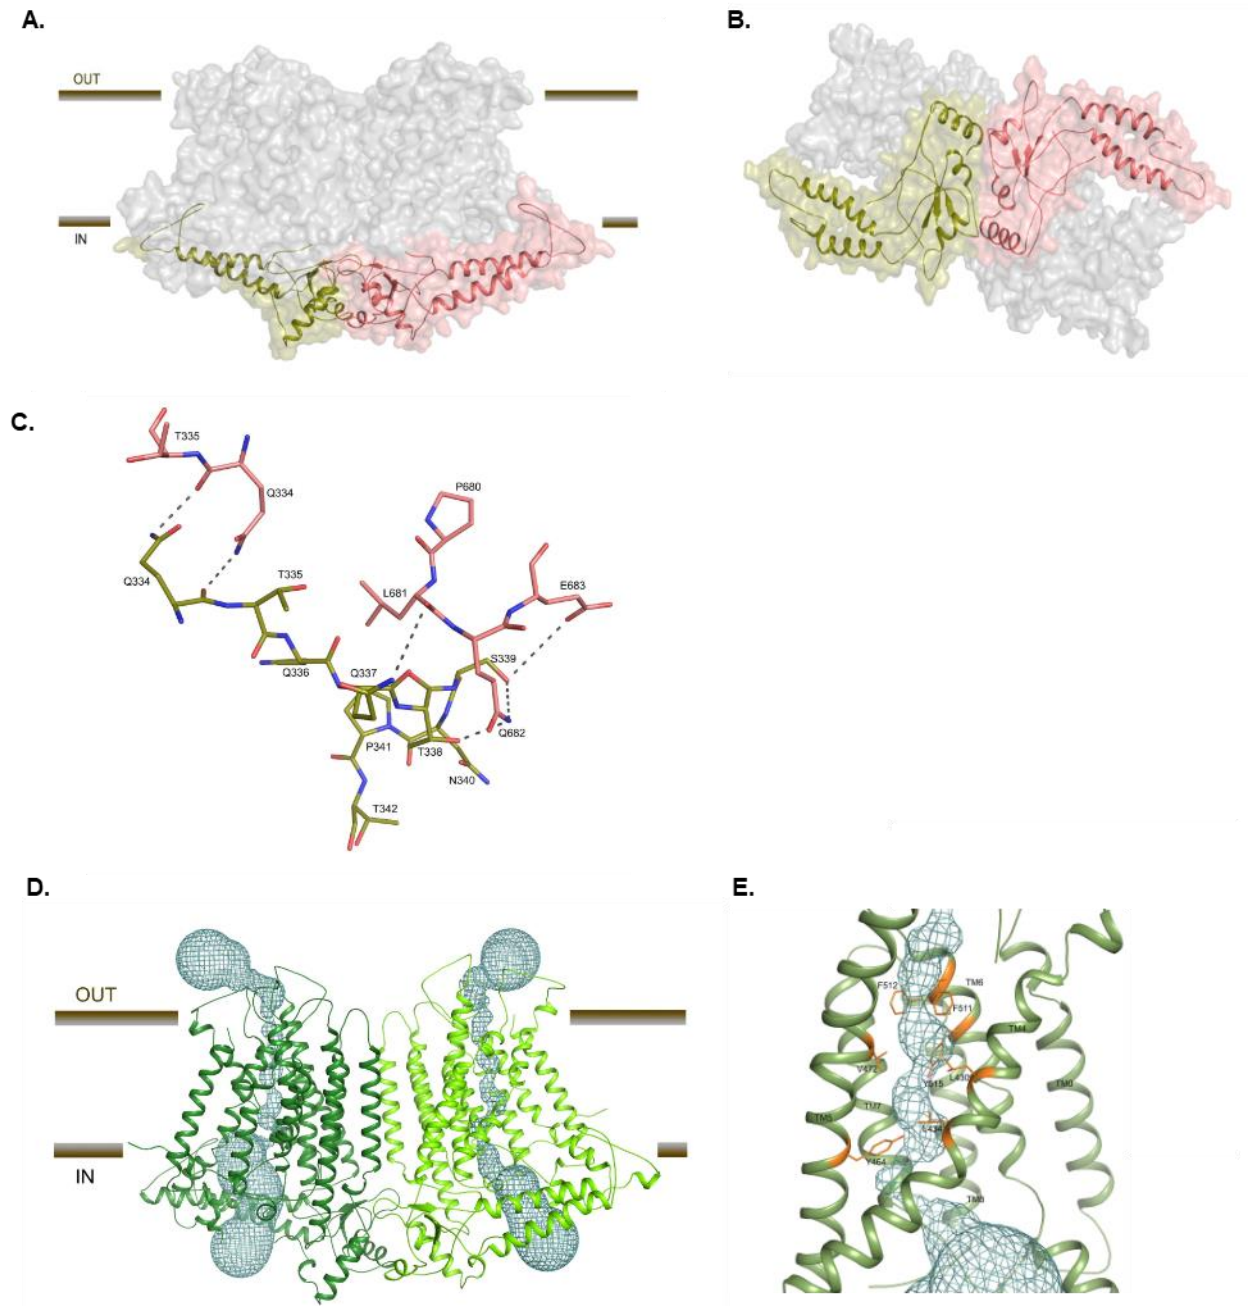

646  
647  
648  
649  
650  
651  
652  
653  
654

**Figure 2. OsOSCA1.2 dimer interface and ion channel pore.** (A) OsOSCA1.2 surface representation. The transmembrane domain is shown as gray and the cytoplasmic domain is colored red and yellow. (B) View of OsOSCA1.2 from the cytoplasmic side. (C) Dimer interface residues. (D) Location of the ion conductance pore in both subunits of OsOSCA1.2. The pore pathway is depicted in a cyan mesh. (E) Close-up view of the neck region, showing the residues 'gating' the pore.

655 **Figure 3**

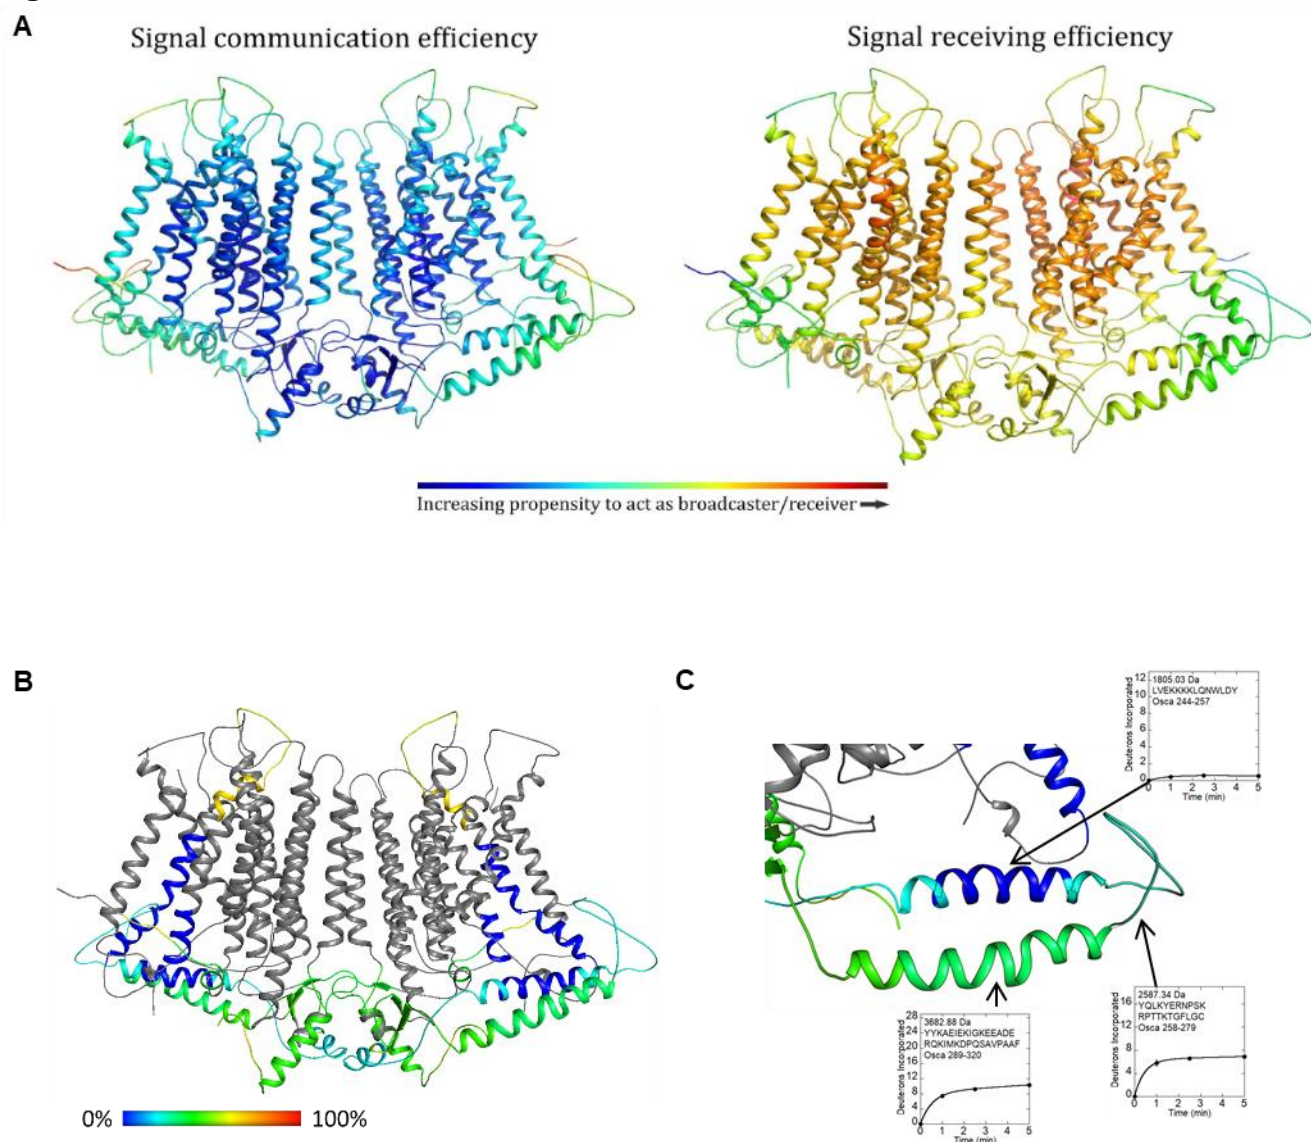

656  
657

658 **Figure 3. Computational and experimental dynamics of OsOSCA1.2.** (A) Results  
659 of OsOSCA1.2 embedded in membrane using the Dynamics suite. Panels show a  
660 color-coded map superimposed on the model showing signal communication (left) and  
661 receiving (right) efficiency. Regions that are colored red are more active while those  
662 blue inactive with regards to molecular dynamics prediction. (B) Relative uptake after  
663 5 minutes of exchange. Structure is color scaled and superimposed on model. Regions  
664 colored gray yielded no detectable peptide fragments (C) Close-up view of the  
665 extended and gating helix. Uptake plots for selected peptides are shown.  
666 Corresponding protein segments are outlined.  
667

668 **Figure 4**

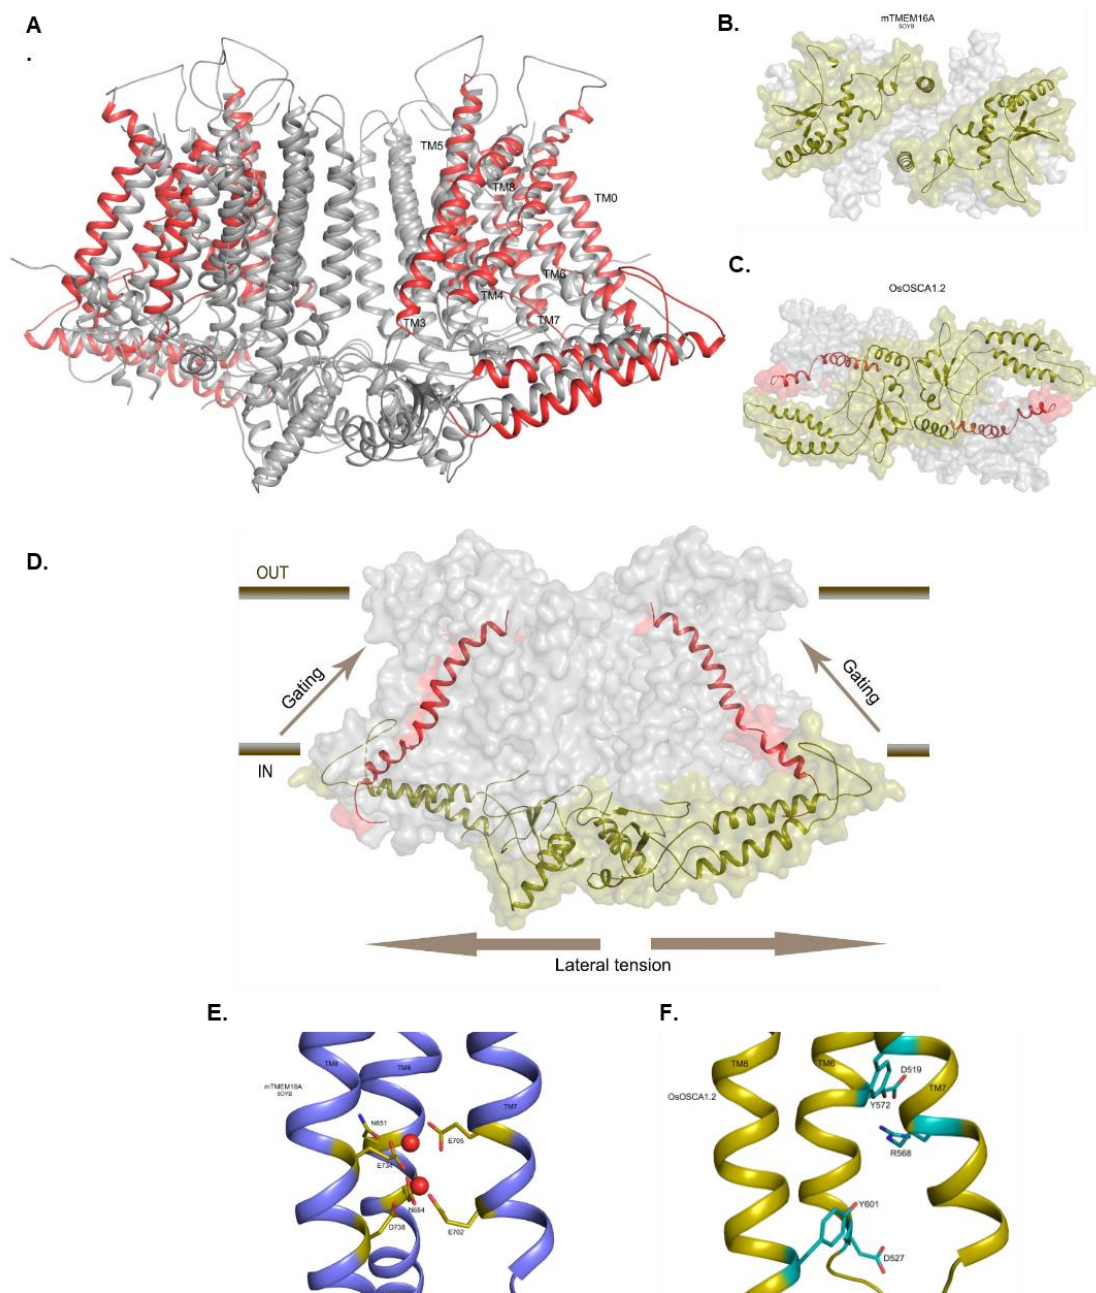

669  
670  
671  
672  
673  
674  
675  
676  
677  
678  
679  
680  
681  
682  
683

**Figure 4. Structural comparisons of OsOSCA1.2 with other TMEM and OSCA structures.** (A) Superposition of OsOSCA1.2 and AtOSCA1 (PDB: PYD1). TMs 1, 2, 9, and 10 (shown in gray) close to lipid-filled cleft are nearly superimposable and have little relative movement. Pore-lining helices (TMs 3-7) showed significant movement along with TM0 and TM8 (shown in red). (B) The mTMEM16A soluble domains from intercellular side are separated. (C) OsOSCA1.2 intracellular soluble domains are together and communicate with channel gating helix TM6. (D) General mechanism of OsOSCA1.2 shown in the plane of the lipid membrane. Lateral tension on the inner leaflet side of the lipid bilayer causes a conformational change in the extended helices of the soluble domain, which is coupled to the gating helix TM6 opening pore. (E) Calcium binding site residues of mTMEM16A. Calcium ions are shown as red spheres. (F) The corresponding region of OsOSCA1.2 with charged and polar residues are shown in cyan.

684 **Figure S1**

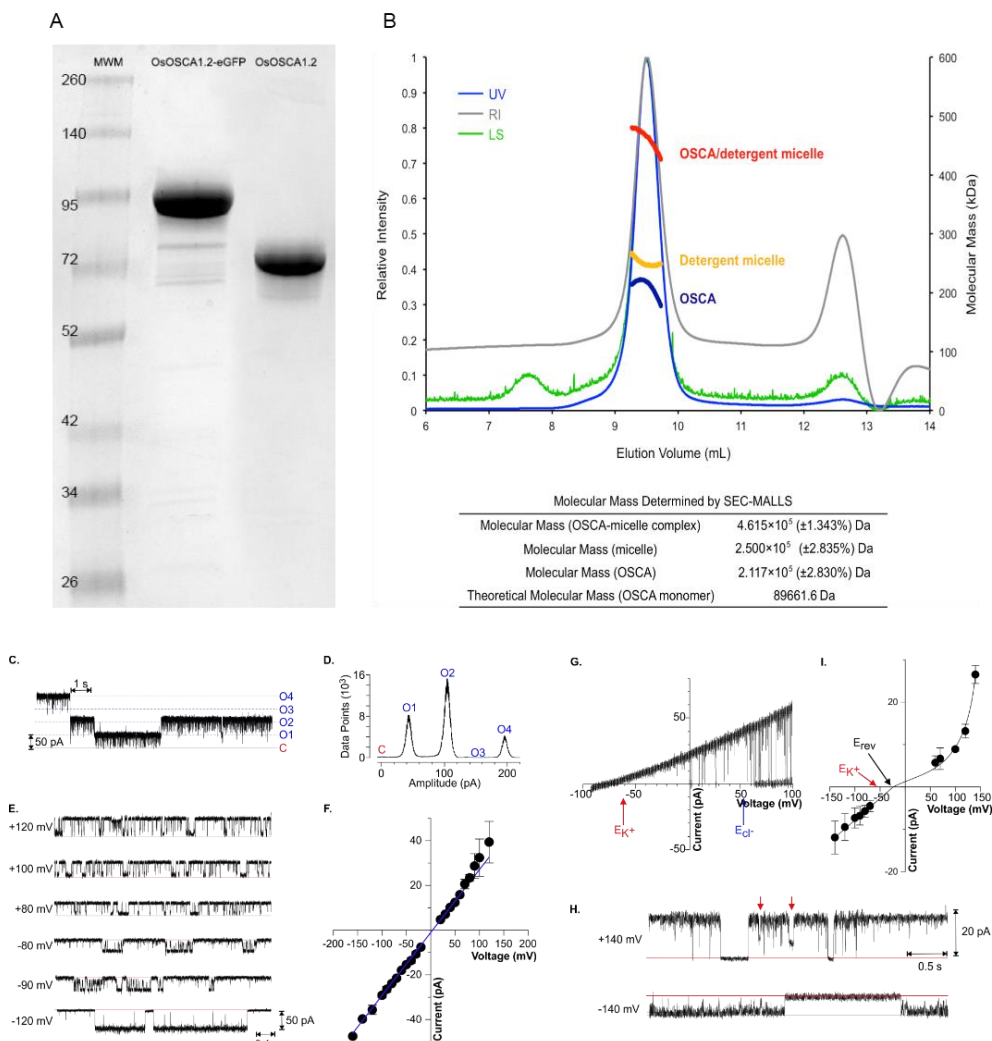

685  
686

687 **Figure S1. Purification and Reconstitution of OsOSCA1.2.** (A) SDS-PAGE (sodium  
688 dodecyl sulfate polyacrylamide gel electrophoresis) of purified OsOSCA1.2 protein with and  
689 without GFP tag. (B) Purified  $\beta$ DDM solubilized OsOSCA1.2 was analysed using size  
690 exclusion chromatography in combination with multi-angle laser light scattering (SEC-  
691 MALLS). Chromatographs show ultraviolet (UV, blue), refractive index (RI, gray) and light  
692 scattering (LS, green) detector readings normalized to the peak maxima (left axis). The thick  
693 lines indicate the calculated molecular masses (right axis) of the complete protein/detergent  
694 complex (red), as well as the contributions of the detergent (yellow) and protein components  
695 (blue) throughout the elution peaks. SEC-MALLS analysis suggests that purified OsOSCA1.2  
696 exists as a dimer in solution. The molecular mass values of the OSCA-micelle complex, the  
697 micelle and the protein as determined by SEC-MALLS. The molecular weight of OsOSCA1.2  
698 was calculated from the amino acid sequence. (C-H) Reconstitution of OsOSCA1.2  
699 proteoliposomes into droplet interface bilayers resulted in discrete single channel currents. (C)  
700 Example traces of four OsOSCA1.2 channels incorporated into a lipid bilayer recorded in  
701 symmetric 150 mM KCl conditions at a holding potential of +140 mV. Upward deflections  
702 indicate channel opening representing outward currents (*trans* to *cis*). The zero current (closed  
703 state) and conducting (open state) levels are indicated by the red solid and blue dotted lines,  
704 respectively. Time and current scales are shown on the top and bottom left corners. (D)  
705 Relative histograms illustrating the close and open states distributions for the full-length  
706 recordings illustrated on the left. The zero current level (closed state) and conducting (open)  
707 state labelled on top correspond to those levels shown on traces on the left. (E) Single channel  
708 recordings from a bilayer containing a single active OsOSCA1.2 channel. Recordings were

709 obtained in symmetrical conditions (150:150mM KCl) in response to the holding potential  
710 indicated on the left of each trace. The zero current levels are indicated by the red solid lines.  
711 At positive potentials, upward deflections indicate channel opening representing outward  
712 currents (*trans* to *cis*); at negative potentials downward deflections indicate channel opening  
713 representing inward currents (*cis* to *trans*). Time and current scales for all traces are shown  
714 on the right bottom margin of the last trace. Note the different time scale relative to the traces  
715 shown in (C). (F) Single channel current amplitude as a function of voltage obtained from  
716 recordings as for those shown in F. In symmetrical 150 mM KCl conditions the channel showed  
717 no sign of current rectification, with a unitary conductance of  $284 \pm 2$  pS ( $n=3$  bilayers), as  
718 determined from a linear regression for values between +120 and  $-160$  mV. (G) current-  
719 voltage ramp ( $-100$  to  $+100$  mV / 1.5 s) of an OsOSCA1.2 channel in asymmetrical 15:150  
720 mM KCl (pH 7.4) *cis:trans* conditions. Four consecutive ramps are superimposed. The values  
721 for the theoretical Nernst potential for  $K^+$  ( $E_{K^+}$ ) and  $Cl^-$  ( $E_{Cl^-}$ ) are indicated by the arrows. (H)  
722 Example of single channel recordings from a bilayer containing a single active OsOSCA1.2  
723 channel in asymmetrical conditions (15 :150mM KCl) in response to the holding potential  
724 indicated on the left of each trace. The zero current levels are indicated by the red solid lines.  
725 The red arrows on top of the  $+140$  mV illustrates a brief closure of about 50% the full current  
726 amplitude. This 50% state was rarely resolved as long-lasting events as those illustrated by  
727 the arrows, but rather appear as a fast flickery behaviour (also see traces in part E). (I) Single  
728 channel current amplitude as a function of voltage for OsOSCA1.2 under asymmetrical 15:150  
729 mM KCl conditions. The current to voltage relationship was built from steady-state recordings  
730 of single-channel activity as those exemplified in part H. The unitary conductance of the inward  
731 current and reversal potential ( $E_{rev}$ ) were determined by fitting of a linear regression of the  
732 inward (i.e. negative) currents.  $E_{rev}$  (black arrow) was  $-26$  mV and the slope (conductance)  
733  $103 \pm 4$  pS. The theoretical Nernst potential for  $K^+$  ( $E_{K^+}$ ) was  $-54$  mV and is indicated by the  
734 red arrow.  
735  
736

737 **Figure S2**  
738

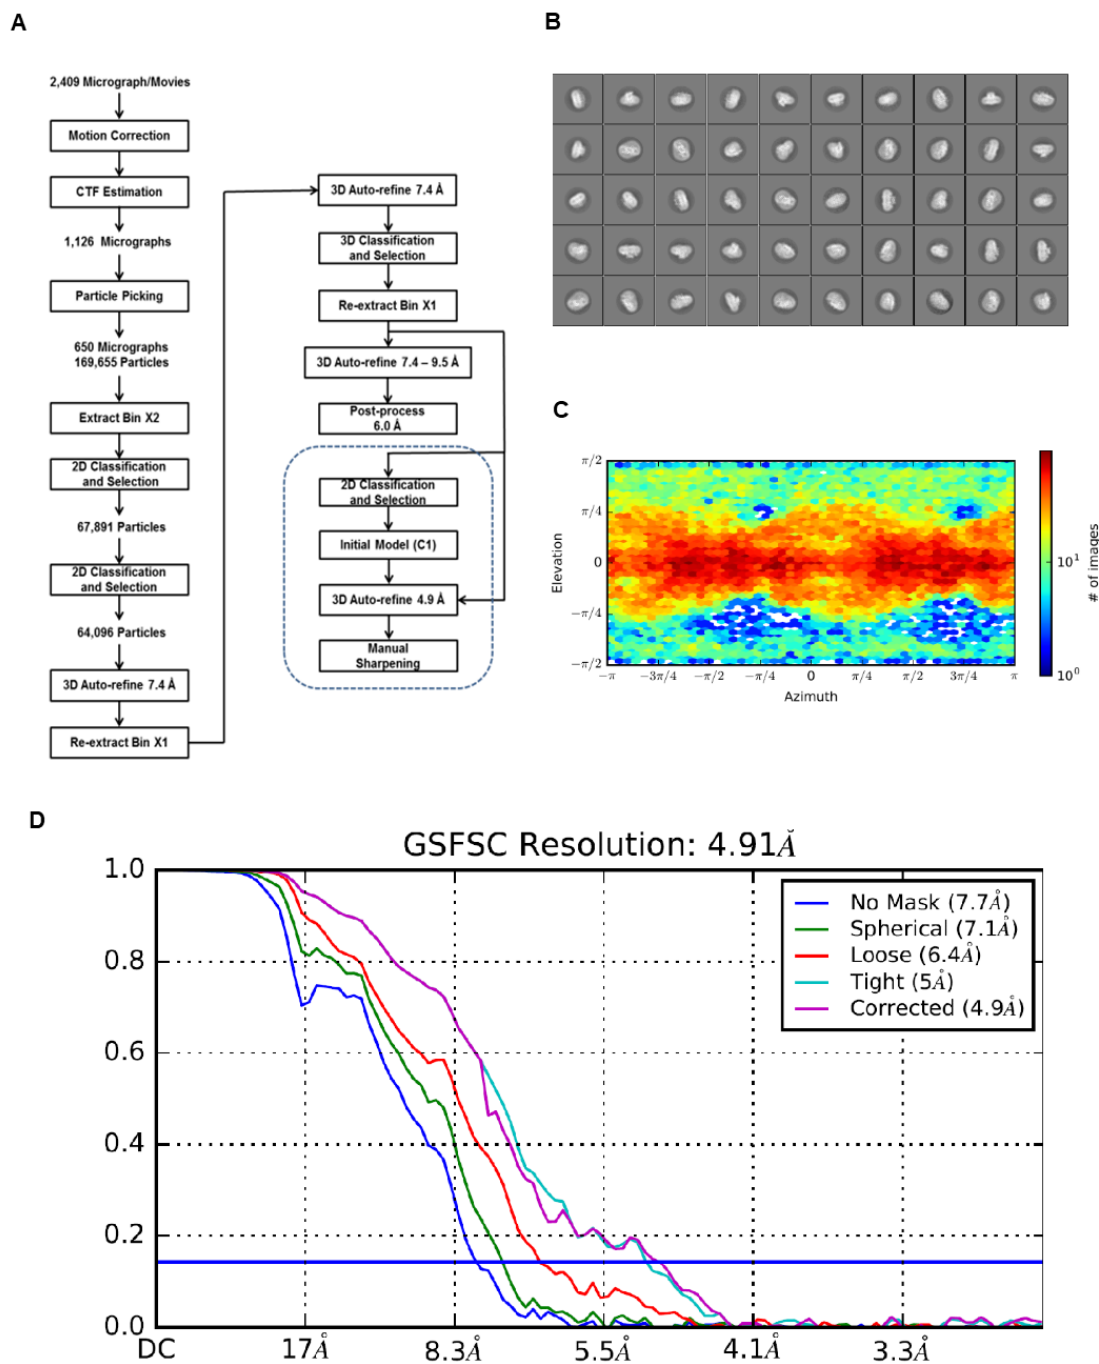

739  
740  
741  
742  
743  
744  
745  
746

**Figure S2. Cryo-EM of OscaA1.2.** (A) Data processing flow chart for the 4.9 Å VPP map. (B) 2D-class averages. (C) Angular distribution of particles contributing to the final 4.9 Å map. (D) GSFSC plots of unmasked and masked maps.

747 **Figure S3**  
748  
749

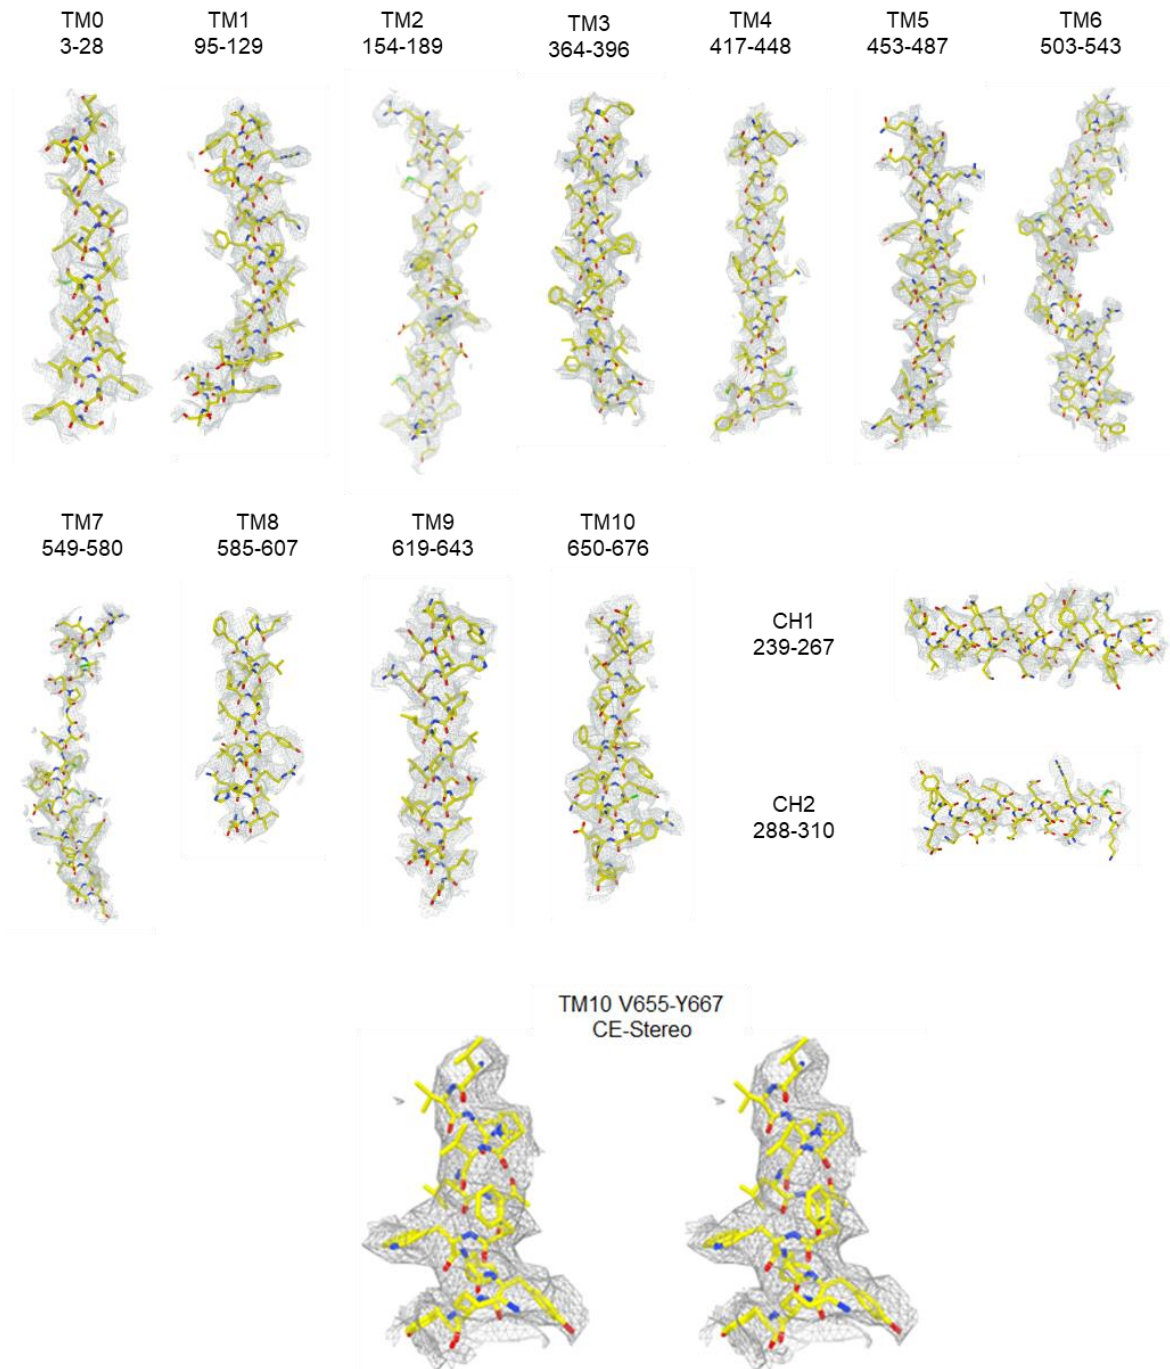

750  
751  
752  
753  
754  
755  
756

**Figure S3. Representative density of OscA1.2.** Shown are density maps for all 11 TM helices (TM0-TM10) and the cytoplasmic helices (CH1-CH2) of the soluble domain. A cross-eyed stereo-view of TM10 demonstrating the quality fit of large aromatic side chains used to sequence registration.

757 **Figure S4**  
758

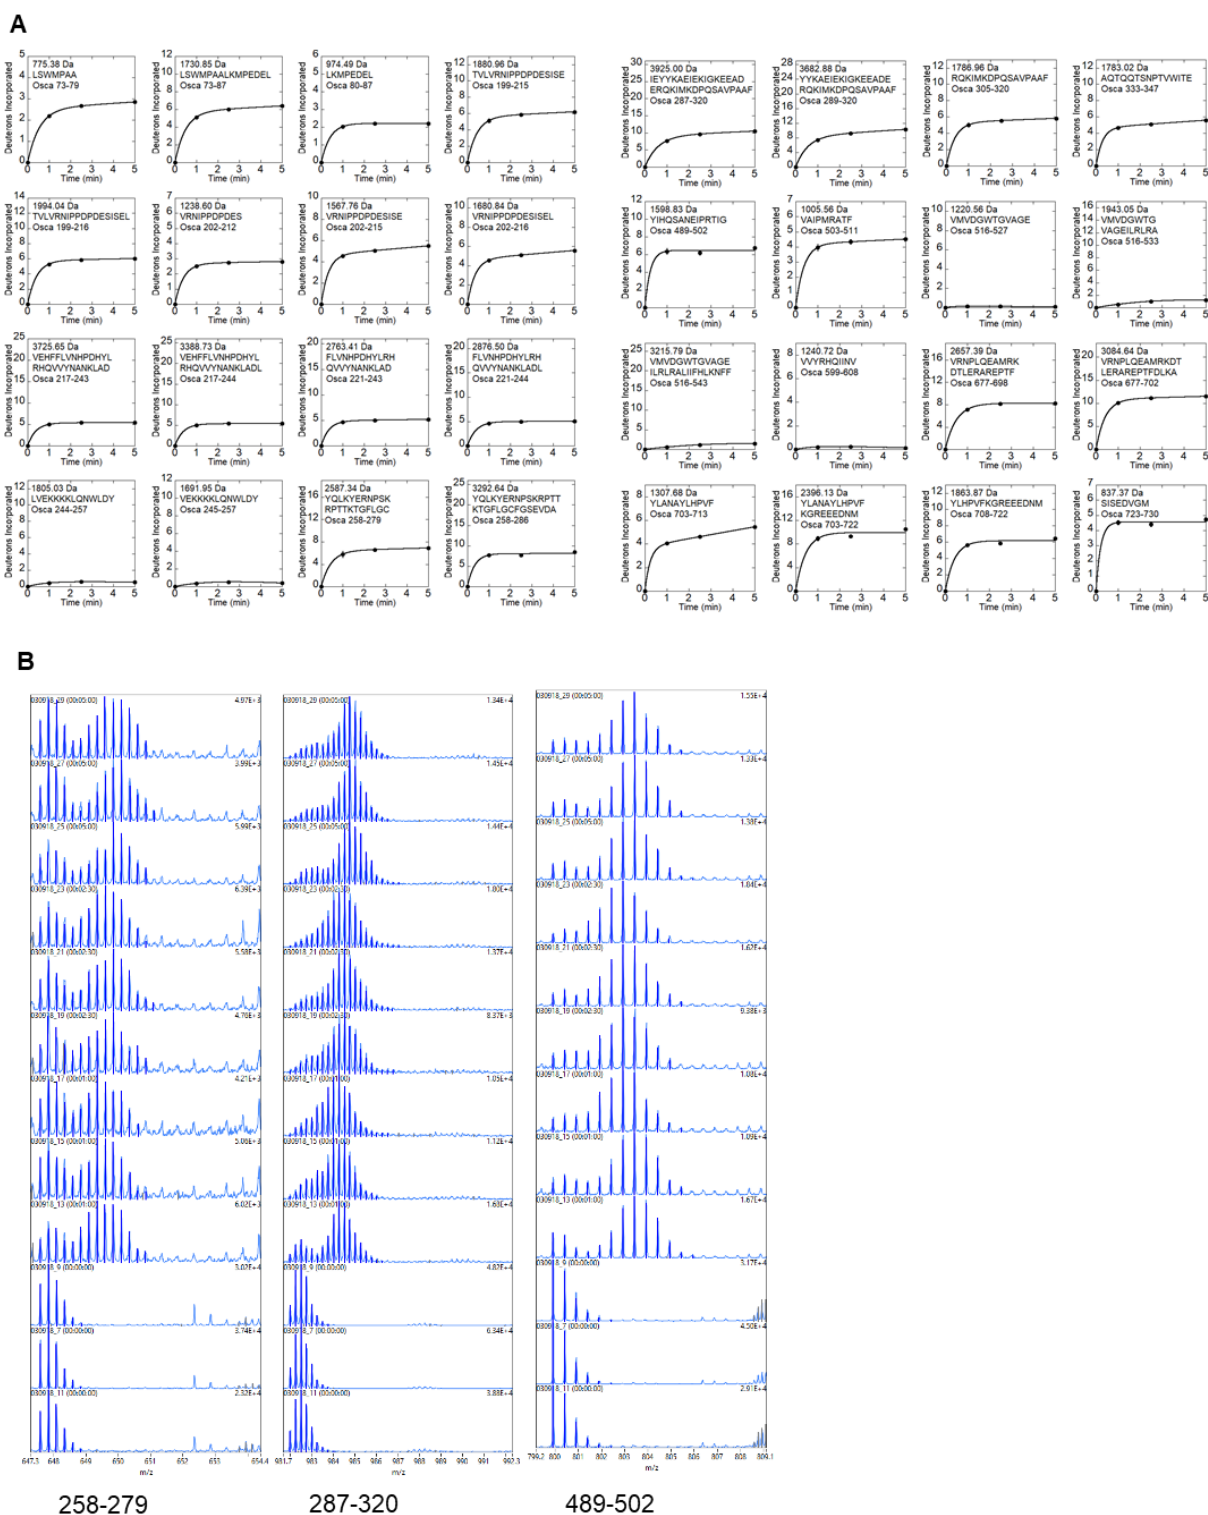

759  
760  
761  
762  
763  
764  
765

**Figure S4. HDXMS Deuterium uptake plots.** (A) Deuterium uptake plots for all peptides identified following HDXMS. (B) Representative mass spectra displaying bimodal deuterium uptake.



766 **Figure S5**  
767

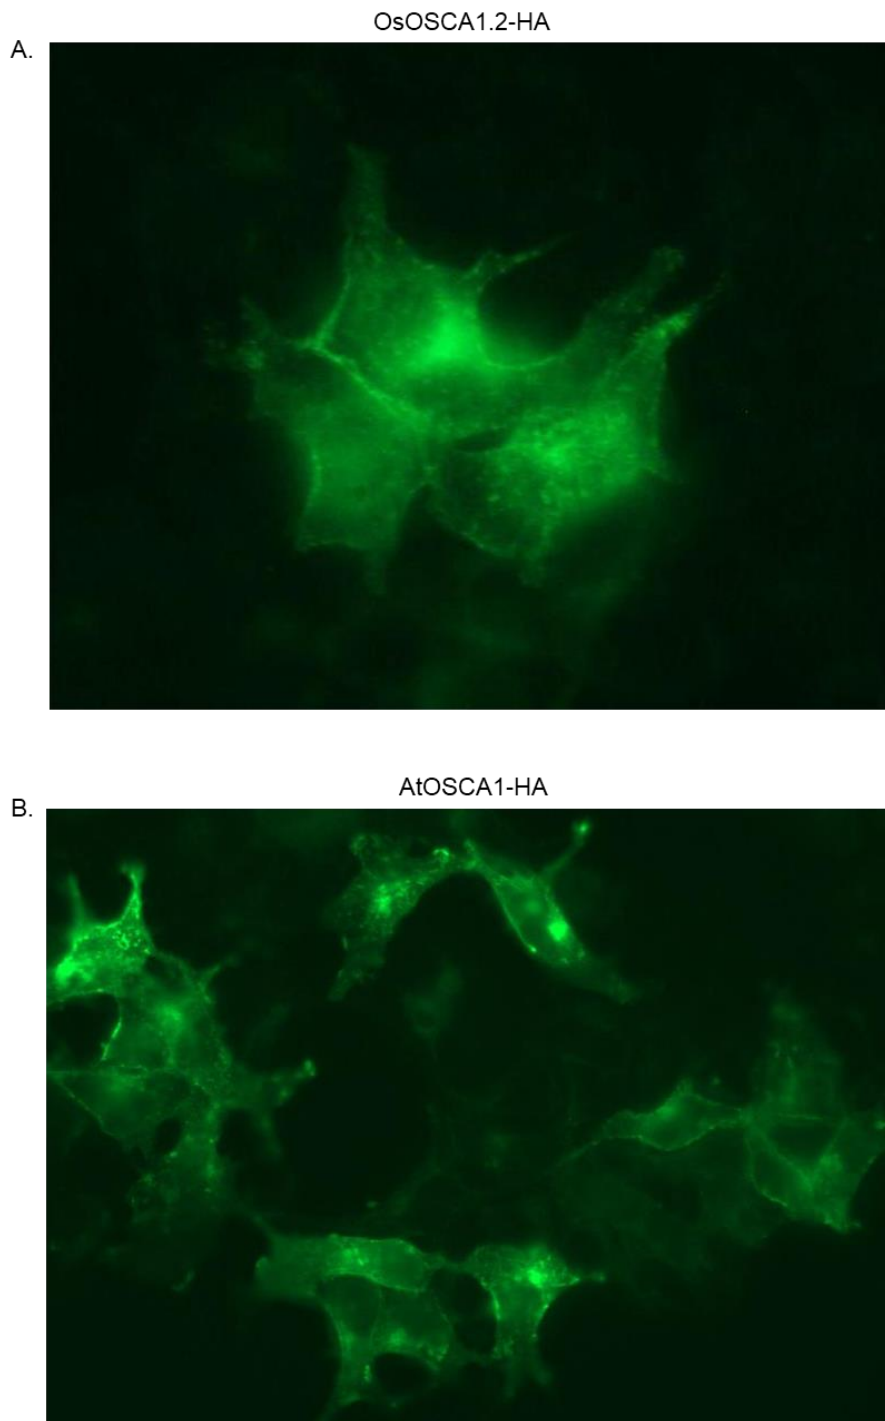

768  
769  
770  
771  
772  
773  
774  
775

**Figure S5. Expression of OsOSCA1.2/AtOSCA1 with C-terminal HA-tag in mammalian tsA21 cells.** Immunostain of anti-HA antibody with Alexa 488 suggests exposure of C-terminal HA-tag on the outside of (A) OsOSCA1.2-HA and (B) AtOSCA1-HA. Cells were not permeabilized.

776 **Figure S6**  
777

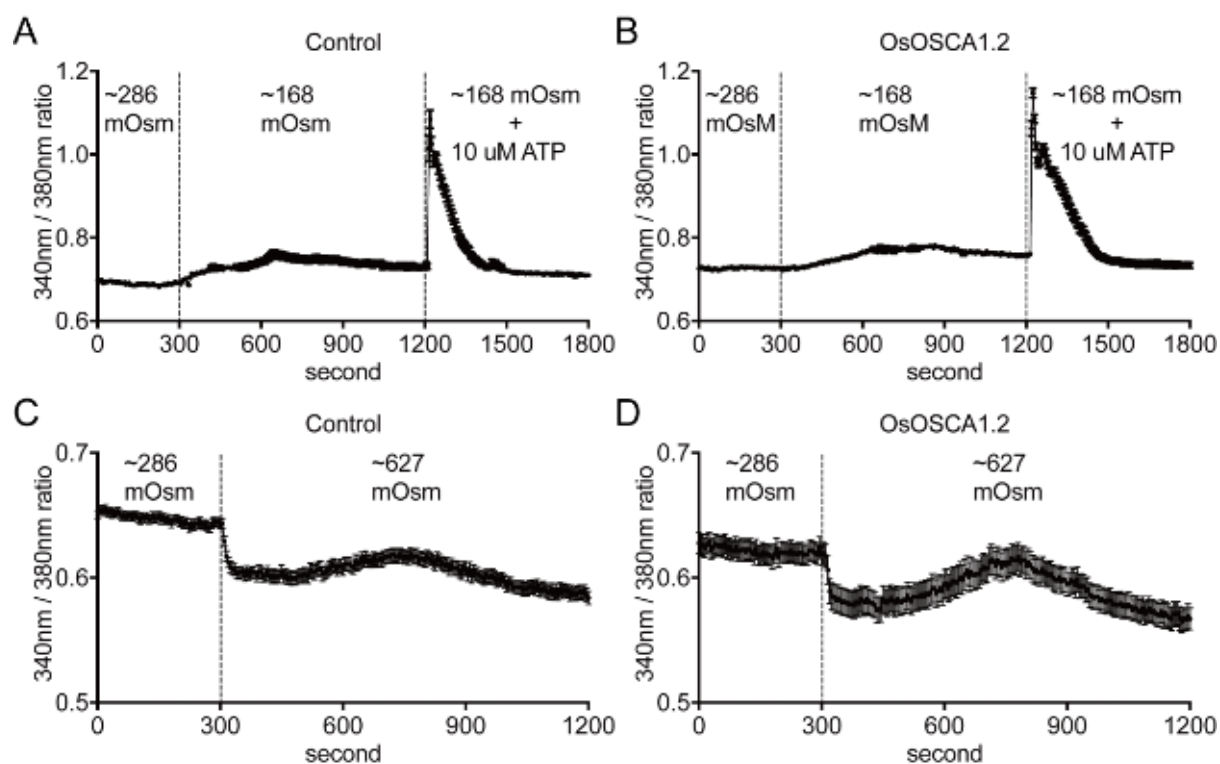

778  
779  
780  
781  
782  
783  
784  
785  
786  
787  
788  
789  
790  
791

**Figure S6. OsOSCA1.2 does not alter calcium responses in tsA21 cells under osmotic stresses.** Time-resolved intracellular calcium concentration changes were analysed in tsA21 cells transformed with the pCDNA3.1 vector (control) or OsOSCA1.2 as indicated in each panel using a ratiometric fluorescent calcium indicator, Fura-2AM. The ratios of fluorescence intensities in response to excitation at 340 nm and 380 nm were calculated in individual cells and average traces of cells are shown (A and B). tsA21 cells were exposed to hypo-osmotic stress by shifting the osmolality of the bath solution from ~286 mOsm to ~168 mOsm and followed by adding 10  $\mu$ M ATP. (C and D) tsA21 cells were exposed to hyper-osmotic stress by shifting the osmolarity of the bath solution from ~286 mOsm to ~627 mOsm. Data represent mean  $\pm$  SE. n = 45 cells in A, 49 cells in B, 39 cells in C, and 23 cells in D.

792 **Figure S7**

793

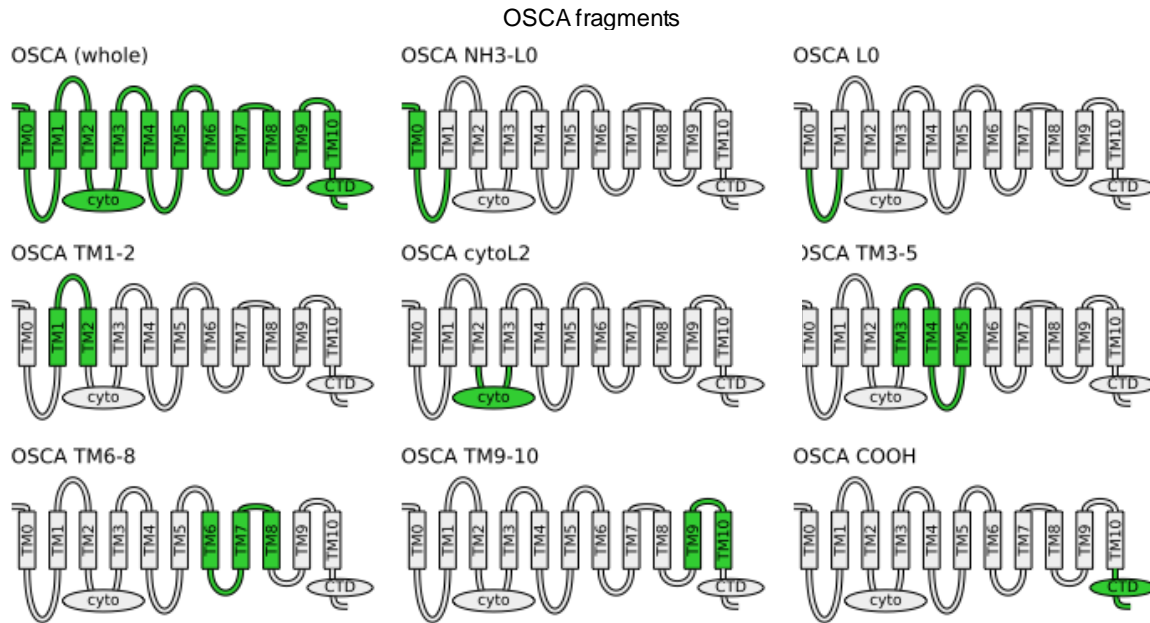

794

795

796 **Figure S7. OSCA Fragments Selected for Homolog Searches.** OSCA fragments  
797 selected for BLAST searches are shown in green while the remainder of the protein is  
798 shaded light gray. Due to its extremely short length (23aa), fragment NH3-TM0 was  
799 discarded in favor of NH3-L0, which includes loop 0. Two fragments containing L0  
800 (NH3-L0 and L0) were selected to probe for the possible origin of TM0.

801

802

803

804 **Figure S8**

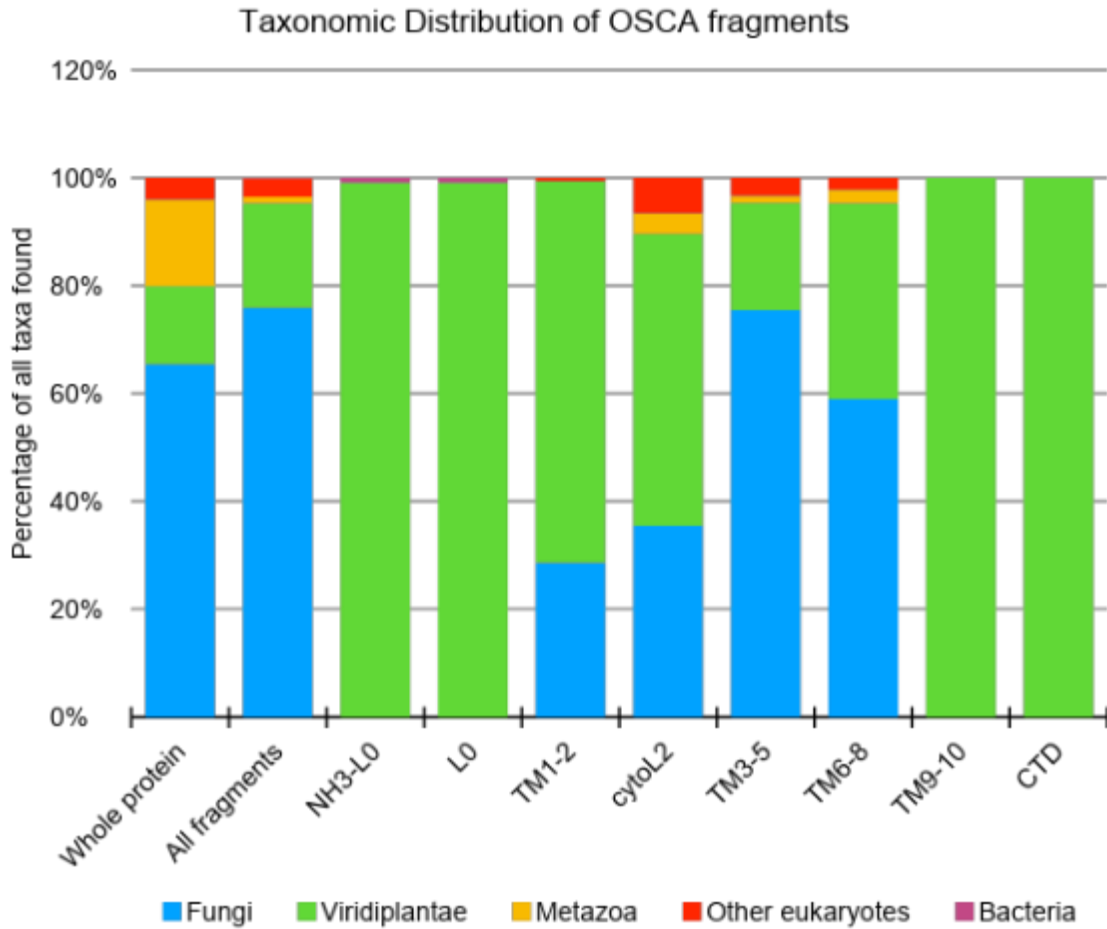

805  
806  
807  
808  
809  
810  
811

**Figure S8. Taxonomic distribution of OSCA fragments.** Columns 3 to 10 correspond to different OSCA fragments and show the relative frequency of the taxonomic groups identified in **Table S1**. Plants appear to be the only organisms with sequences similar to TM0, TM9, TM10, Loop 0, and the disordered C-terminal domain.

812 **Figure S9**  
813

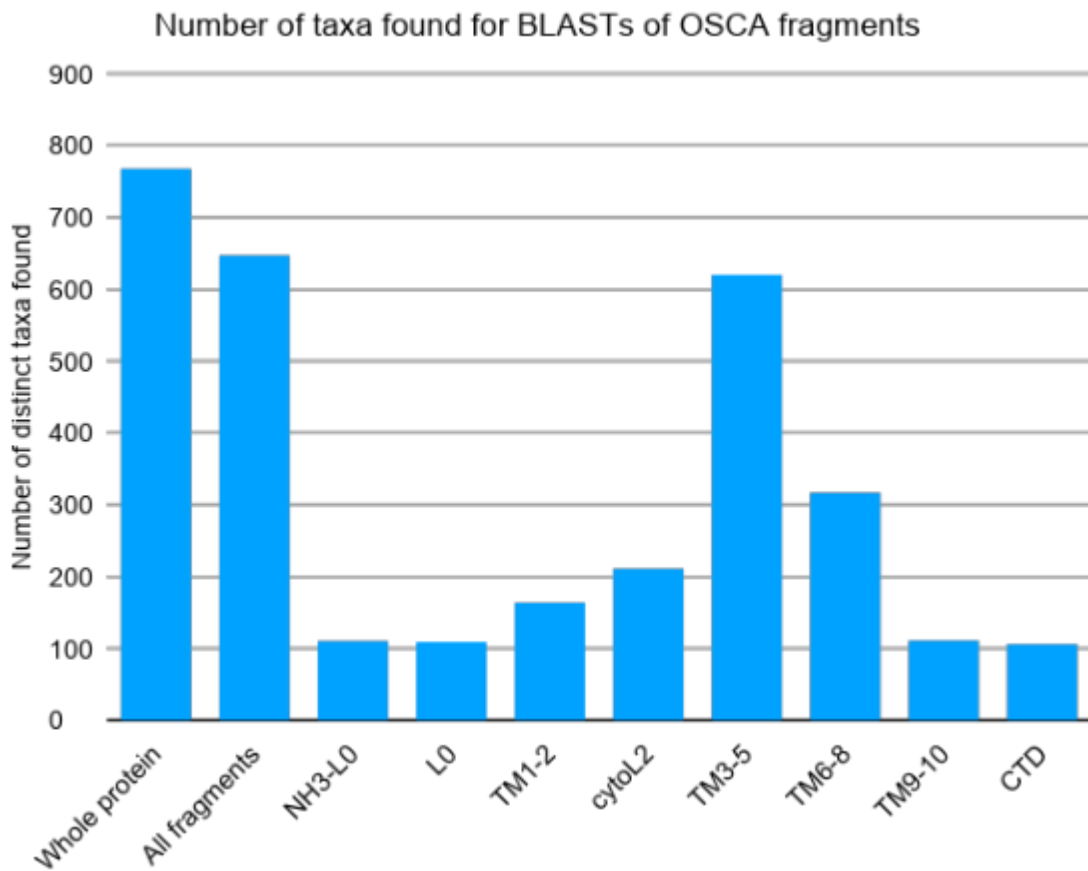

814  
815

816 **Figure S9. Raw frequency of taxa groups containing the different OSCA**  
817 **fragments.** These are the counts used to generate the relative frequencies presented  
818 in Table S1 and Figure S9. Note that NH3-L0 and L0 hit the hypothetical enterococcal  
819 protein PWS22870 despite matching fewer taxa.  
820

821 **Table S1**  
822

| Taxonomic Distribution of selected osOSCA fragments |                  |        |               |        |       |        |        |        |        |        |        |
|-----------------------------------------------------|------------------|--------|---------------|--------|-------|--------|--------|--------|--------|--------|--------|
|                                                     |                  | Whole  | All fragments | NH3-L0 | L0    | TM 1-2 | cytoL2 | TM3-5  | TM6-8  | TM9-10 | CTD    |
| <b>BLAST stats</b>                                  |                  |        |               |        |       |        |        |        |        |        |        |
|                                                     | Query length     | 766    | N/A           | 92     | 69    | 96     | 172    | 118    | 103    | 53     | 94     |
|                                                     | Hits             | 3702   | 5017          | 1025   | 1025  | 1861   | 2606   | 3968   | 2978   | 1123   | 888    |
| <b>Taxonomic stats (%)</b>                          |                  |        |               |        |       |        |        |        |        |        |        |
|                                                     | Eukaryota        | 100.0% | 99.8%         | 99.1%  | 99.1% | 100.0% | 100.0% | 100.0% | 100.0% | 100.0% | 100.0% |
|                                                     | Fungi            | 65.5%  | 75.9%         | 0.0%   | 0.0%  | 28.7%  | 35.5%  | 75.5%  | 59.0%  | 0.0%   | 0.0%   |
|                                                     | Viridiplantae    | 14.5%  | 19.3%         | 99.1%  | 99.1% | 70.7%  | 54.0%  | 19.8%  | 36.3%  | 100.0% | 100.0% |
|                                                     | Metazoa          | 16.0%  | 1.2%          | 0.0%   | 0.0%  | 0.0%   | 3.8%   | 1.3%   | 2.5%   | 0.0%   | 0.0%   |
|                                                     | Other eukaryotes | 4.0%   | 3.4%          | 0.0%   | 0.0%  | 0.6%   | 6.6%   | 3.4%   | 2.2%   | 0.0%   | 0.0%   |
|                                                     | Bacteria         | 0.0%   | 0.2%          | 0.9%   | 0.9%  | 0.0%   | 0.0%   | 0.0%   | 0.0%   | 0.0%   | 0.0%   |

823  
824  
825  
826  
827  
828  
829  
830  
831  
832  
833  
834  
835  
836  
837

**Table S1: Taxonomic distribution of selected OSCA Fragments.** To narrow down the possible regions associated with OSCA's osmo/mechanosensing behavior, the primary sequence of OsOSCA1.2 was split into eight fragments (**Figure S8**). Each fragment was BLASTed against the NCBI's non-redundant protein database (E-value  $< 10^{-5}$  and query coverage  $\geq 80\%$ ) and the taxonomic information associated with each hit was extracted. Each column corresponds to a separate fragment. The column labelled "All fragments" consists of the union of taxa after merging all the data. Interestingly, one small hypothetical protein (PWS22870) from *Enterococcus faecium* was found with high significance (E-value  $< 10^{-40}$ ; identity  $> 70\%$ ) and high coverage (88%) for the fragments containing TM0 and L0. However, as PWS22870 does not hit any other bacterial proteins, it cannot be ruled out that this is potentially the result of a sequencing error or a contaminating DNA fragment.

838 **References**

839

- 840 1. Yuan F, *et al.* (2014) OSCA1 mediates osmotic-stress-evoked Ca<sup>2+</sup> increases vital  
841 for osmosensing in Arabidopsis. *Nature* 514(7522):367-371.
- 842 2. Knight H, Trewavas AJ, & Knight MR (1997) Calcium signalling in Arabidopsis  
843 thaliana responding to drought and salinity. *Plant J* 12(5):1067-1078.
- 844 3. Stephan AB, Kunz HH, Yang E, & Schroeder JI (2016) Rapid hyperosmotic-  
845 induced Ca<sup>2+</sup> responses in Arabidopsis thaliana exhibit sensory potentiation and  
846 involvement of plastidial KEA transporters. *Proc Natl Acad Sci U S A*  
847 113(35):E5242-5249.
- 848 4. Murthy SE, *et al.* (2018) OSCA/TMEM63 are an Evolutionarily Conserved Family  
849 of Mechanically Activated Ion Channels. *Elife* 7.
- 850 5. Medrano-Soto A, *et al.* (2018) Bioinformatic characterization of the Anoctamin  
851 Superfamily of Ca<sup>2+</sup>-activated ion channels and lipid scramblases. *PLoS One*  
852 13(3):e0192851.
- 853 6. Jojoa-Cruz S, *et al.* (2018) Cryo-EM structure of the mechanically activated ion  
854 channel OSCA1.2. *Elife* 7.
- 855 7. Zhang M, *et al.* (2018) Structure of the mechanosensitive OSCA channels. *Nat*  
856 *Struct Mol Biol* 25(9):850-858.
- 857 8. Barad BA, *et al.* (2015) EMRinger: side chain-directed model and map validation  
858 for 3D cryo-electron microscopy. *Nature methods* 12(10):943-946.
- 859 9. Saier MH, Jr., *et al.* (2016) The Transporter Classification Database (TCDB):  
860 recent advances. *Nucleic acids research* 44(D1):D372-379.
- 861 10. Brunner JD, Lim NK, Schenck S, Duerst A, & Dutzler R (2014) X-ray structure of a  
862 calcium-activated TMEM16 lipid scramblase. *Nature* 516(7530):207-212.
- 863 11. Dang S, *et al.* (2017) Cryo-EM structures of the TMEM16A calcium-activated  
864 chloride channel. *Nature* 552(7685):426-429.
- 865 12. Rai A, Suprasanna P, D'Souza SF, & Kumar V (2012) Membrane topology and  
866 predicted RNA-binding function of the 'early responsive to dehydration (ERD4)'  
867 plant protein. *PLoS One* 7(3):e32658.
- 868 13. Krissinel E & Henrick K (2007) Inference of macromolecular assemblies from  
869 crystalline state. *J Mol Biol* 372(3):774-797.
- 870 14. Liu X, Wang J, & Sun L (2018) Structure of the hyperosmolality-gated calcium-  
871 permeable channel OSCA1.2. *Nat Commun* 9(1):5060.
- 872 15. Smart OS, Breed J, Smith GR, & Sansom MS (1997) A novel method for structure-  
873 based prediction of ion channel conductance properties. *Biophys J* 72(3):1109-  
874 1126.
- 875 16. Li H, Chang YY, Lee JY, Bahar I, & Yang LW (2017) DynOmics: dynamics of  
876 structural proteome and beyond. *Nucleic acids research* 45(W1):W374-W380.
- 877 17. Wales TE & Engen JR (2006) Hydrogen exchange mass spectrometry for the  
878 study of proteins. *Mass Spec. Rev.* 25:158-170.
- 879 18. Truhlar SME, Croy CH, Torpey JW, Koeppe JR, & Komives EA (2006) Solvent  
880 Accessibility of Protein Surfaces by Amide H/2H Exchange MALDI-TOF Mass  
881 Spectrometry. *J. Am. Soc. Mass Spectrom.* 17:1490-1497.
- 882 19. Hou C, *et al.* (2014) DUF221 proteins are a family of osmosensitive calcium-  
883 permeable cation channels conserved across eukaryotes. *Cell research*  
884 24(5):632-635.

- 885 20. Paulino C, Kalienkova V, Lam AKM, Neldner Y, & Dutzler R (2017) Activation  
886 mechanism of the calcium-activated chloride channel TMEM16A revealed by  
887 cryo-EM. *Nature* 552(7685):421-425.
- 888 21. Li MJ, Guttman M, & Atkins WM (2018) Conformational dynamics of P-  
889 glycoprotein in lipid nanodiscs and detergent micelles reveal complex motions  
890 on a wide time scale. *J. Biol. chem.*:6297-6307.
- 891 22. Slotboom DJ, Duurkens RH, Olieman K, & Erkens GB (2008) Static light scattering  
892 to characterize membrane proteins in detergent solution. *Methods* 46(2):73-82.
- 893 23. Mulligan C, *et al.* (2009) The substrate-binding protein imposes directionality on  
894 an electrochemical sodium gradient-driven TRAP transporter. *Proc Natl Acad Sci*  
895 *U S A* 106(6):1778-1783.
- 896 24. Hwang WL, Chen M, Cronin B, Holden MA, & Bayley H (2008) Asymmetric  
897 droplet interface bilayers. *J Am Chem Soc* 130(18):5878-5879.
- 898 25. Leptihn S, *et al.* (2013) Constructing droplet interface bilayers from the contact  
899 of aqueous droplets in oil. *Nat Protoc* 8(6):1048-1057.
- 900 26. Syeda R, Holden MA, Hwang WL, & Bayley H (2008) Screening blockers against a  
901 potassium channel with a droplet interface bilayer array. *J Am Chem Soc*  
902 130(46):15543-15548.
- 903 27. Coste B, *et al.* (2012) Piezo proteins are pore-forming subunits of mechanically  
904 activated channels. *Nature* 483(7388):176-181.
- 905 28. Shaff J, Schultz B, Craft EJ, Clark RT, & Kochian LV (2010) GEOCHEM-EZ: a  
906 chemical speciation program with greater power and flexibility. *Plant and Soil*  
907 *Journal* 330:207-214.
- 908 29. Adams PD, *et al.* (2010) PHENIX: a comprehensive Python-based system for  
909 macromolecular structure solution. *Acta Crystallogr D Biol Crystallogr* 66(Pt  
910 2):213-221.
- 911 30. Emsley P, Lohkamp B, Scott WG, & Cowtan K (2010) Features and development  
912 of Coot. *Acta Crystallogr D Biol Crystallogr* 66(Pt 4):486-501.
- 913 31. Chen Q, *et al.* (2017) Structure of mammalian endolysosomal TRPML1 channel in  
914 nanodiscs. *Nature* 550(7676):415-418.
- 915 32. Zhang K (2016) Gctf: Real-time CTF determination and correction. *J Struct Biol*  
916 193(1):1-12.
- 917 33. Scheres SH (2012) A Bayesian view on cryo-EM structure determination. *J Mol*  
918 *Biol* 415(2):406-418.
- 919 34. Punjani A, Rubinstein JL, Fleet DJ, & Brubaker MA (2017) cryoSPARC: algorithms  
920 for rapid unsupervised cryo-EM structure determination. *Nature methods*  
921 14(3):290-296.
- 922 35. Kucukelbir A, Sigworth FJ, & Tagare HD (2014) Quantifying the local resolution  
923 of cryo-EM density maps. *Nature methods* 11(1):63-65.
- 924 36. Grynkiewicz G, Poenie M, & Tsien RY (1985) A new generation of Ca<sup>2+</sup> indicators  
925 with greatly improved fluorescence properties. *The Journal of biological*  
926 *chemistry* 260(6):3440-3450.
- 927 37. Schindelin J, *et al.* (2012) Fiji: an open-source platform for biological-image  
928 analysis. *Nature methods* 9(7):676-682.
- 929
